# Supplementary material for: A cellular and molecular atlas reveals the basis of chytrid development
Source: eLife. 2022 Mar 1;11:e73933. doi: 10.7554/eLife.73933 (PMC8887899; doi:10.7554/eLife.73933)
Supplement: Figure 2—source data 1. [file elife-73933-fig2-data1.xlsx]

## Sheet: All SBFSEM Data (Fig 2)
Volume (µm3)
Replicate Name	Life Stage	Total Volume	Cell Wall	Cytosolic Lipid	Endomembrane	Glycogen	Golgi Apparatus	Microbodies	Mitochondria	Nucleus	Peripheral Bodies	Ribosome Cluster	Rumpsome	Striated Inclusion	Vacuole-bound Lipid	Vacuoles	Vesicles	Total Assigned Organelles	Unassigned Cytosol	Vacuoles + Lipid Contents	Total Lipid Fraction	Total Endomembrane Fraction
ZOO_1	Zoospore	20.8885	0	0.45547	0.225171	0.176565	0	0.28097	1.8201	1.9588	0	3.57942	0.053046	0	0	0.339028	0	8.88857	11.9999	0.339028	0.45547	0.845168
ZOO_2	Zoospore	20.762	0	1.3296	0.108413	0.766619	0	0.29621	2.12176	2.0814	0	3.8126	0.045615	0.042373	0	0.651518	0	11.2561	9.50589	0.651518	1.3296	1.05614
ZOO_3	Zoospore	18.09	0	0.49267	0.240723	0.14709	0	0.0482073	1.8508	1.8788	0	4.3924	0.054828	0	0	0.16391	0	9.26943	8.82057	0.16391	0.49267	0.45284
ZOO_4	Zoospore	22.764	0	0.53789	0.2679	0.236889	0	0.47712	2.1196	2.7955	0	4.86222	0.060889	0.069437	0	0.337486	0	11.7649	10.9991	0.337486	0.53789	1.08251
ZOO_5	Zoospore	21.239	0	1.6521	0.133894	0.331111	0	0.0263811	1.77094	2.0001	0	4.49107	0.052694	0.048112	0	0.947566	0	11.454	9.78503	0.947566	1.6521	1.10784
Mean	Zoospore	20.7487	0	0.893546	0.19522	0.331655	0	0.225778	1.93664	2.14292	0	4.22754	0.0534144	0.0319844	0	0.487901	0	10.5266	10.2221	0.487901	0.893546	0.908899
Standard Deviation	Zoospore	1.68747	0	0.55782	0.069904	0.253126	0	0.188726	0.170406	0.372056	0	0.522419	0.00546245	0.0308898	0	0.311376	0	1.34064	1.26812	0.311376	0.55782	0.275431
GERM_1	Germling	36.1919	2.41892	0.90976	1.1469	0.494231	0	0.53436	3.2483	4.2784	0.63733	0	0.032984	0	0	2.69089	0	16.3921	19.7998	2.69089	0.90976	5.00948
GERM_2	Germling	31.0898	2.7388	3.2394	0.213742	0.245847	0.221414	0.219797	2.6354	3.8605	0.426275	0	0.023114	0	0	1.92587	0	15.7502	15.3396	1.92587	3.2394	3.0071
GERM_3	Germling	33.4917	2.13466	1.3862	0.433033	0.340009	0	0.31735	3.4082	4.1599	0.53394	0	0.031422	0	0	2.83277	0	15.5775	17.9142	2.83277	1.3862	4.1171
GERM_4	Germling	33.483	2.426	2.9638	0.0871956	0.592707	0.141742	0.30188	2.81203	3.8252	0.5445	0	0	0	0	2.67738	0	16.3724	17.1106	2.67738	2.9638	3.45082
GERM_5	Germling	35.6988	3.2518	0.94477	0.516303	0.493968	0.168069	0.305387	3.3568	4.5232	0.758794	0	0.033737	0	0	2.7547	0	17.1075	18.5913	2.7547	0.94477	4.50325
Mean	Germling	33.991	2.59403	1.88879	0.479434	0.433352	0.106245	0.335755	3.09215	4.12944	0.580168	0	0.0242514	0	0	2.57632	0	16.2399	17.7511	2.57632	1.88879	4.01755
Standard Deviation	Germling	2.04236	0.425307	1.12717	0.410323	0.138425	0.101146	0.117578	0.346913	0.292854	0.124767	0	0.0142045	0	0	0.368787	0	0.606659	1.66998	0.368787	1.12717	0.801863
IMM_1	Immature Thallus	1071.89	23.4925	4.04271	31.0453	129.943	4.75907	0	76.4879	58.646	4.47258	0	0	0	50.6234	118.992	0	502.504	569.389	169.615	54.6661	209.892
IMM_2	Immature Thallus	1366.34	27.2384	6.7392	44.5635	138.275	3.66666	3.11315	95.9818	27.5586	3.06543	0	0	0	61.1666	164.306	0	575.675	790.664	225.473	67.9058	279.881
IMM_3	Immature Thallus	1098.24	28.7661	2.89149	22.5669	86.6921	3.86058	3.61437	78.3805	79.69	4.36714	0	0	0	56.932	131.853	0	499.614	598.627	188.785	59.8234	223.194
IMM_4	Immature Thallus	1231.84	29.8368	1.30679	39.2636	87.7272	5.91835	3.39794	83.7838	105.98	2.84209	0	0	0	32.6329	188.483	0	581.173	650.664	221.116	33.9397	272.538
IMM_5	Immature Thallus	813.144	22.9084	3.78941	16.7032	79.1594	4.28414	0	56.3336	43.899	3.35164	0	0	0	11.4847	116.752	0	358.665	454.479	128.237	15.2742	152.576
Mean	Immature Thallus	1116.29	26.4484	3.75392	30.8285	104.359	4.49776	2.02509	78.1935	63.1547	3.61978	0	0	0	42.5679	144.077	0	503.526	612.764	186.645	46.3218	227.616
Standard Deviation	Immature Thallus	206.198	3.11233	1.98298	11.4851	27.5164	0.898434	1.85717	14.3916	30.6823	0.753296	0	0	0	20.5061	31.2509	0	89.7711	122.699	40.0062	21.4188	51.7552
IMM_1_APO	Immature Thallus (Apophysis)	17.3811	1.9381	0.045558	1.54555	0	0.274255	0	1.71138	0	0.602634	0	0	0	0.280795	1.68215	0	8.08042	9.30068	1.96295	0.326353	4.38539
IMM_2_APO	Immature Thallus (Apophysis)	8.0988	0.936096	0.441121	1.27142	0	0.037324	0	0.277475	0	0	0	0	0	0.09501	1.17151	0	4.22996	3.86884	1.26652	0.536131	2.57527
IMM_3_APO	Immature Thallus (Apophysis)	9.58647	1.07887	0.0109656	0.501522	0	0.04021	0	0.614125	0	0	0	0	0	0.0825876	3.61169	0	5.93996	3.6465	3.69428	0.0935532	4.23601
IMM_4_APO	Immature Thallus (Apophysis)	6.20035	0.686349	0.0298944	1.12958	0	0.061355	0	0.0754848	0	0	0	0	0	0.0548028	0.372745	0	2.41021	3.79014	0.427548	0.0846972	1.61848
IMM_5_APO	Immature Thallus (Apophysis)	19.627	1.99001	0.0459276	2.4997	0	0.351055	0	2.20746	0	0	0	0	0	0.146719	1.00413	0	8.245	11.382	1.15085	0.192647	4.0016
Mean	Immature Thallus (Apophysis)	12.1787	1.32588	0.114693	1.38956	0	0.15284	0	0.977185	0	0.120527	0	0	0	0.131983	1.56844	0	5.78111	6.39763	1.70043	0.246676	3.36335
Standard Deviation	Immature Thallus (Apophysis)	5.9508	0.599547	0.18304	0.729195	0	0.148686	0	0.933688	0	0.269506	0	0	0	0.0896185	1.23425	0	2.50758	3.6754	1.24045	0.188902	1.21234
DEV_1	Developing Zoospore	21.9063	0	1.7379	0.445925	1.01902	0.117471	0.170013	1.89279	1.57	0	0	0.031036	0	0	2.42211	0.154293	9.56056	12.3457	2.42211	1.7379	3.30982
DEV_2	Developing Zoospore	21.1098	0	1.35677	0.312719	0.733157	0.0442359	0.0573261	1.85615	1.6282	0	0	0.0231155	0	0	1.91799	0.137951	8.06762	13.0422	1.91799	1.35677	2.47022
DEV_3	Developing Zoospore	21.2425	0	1.3627	0.323835	1.3999	0.0918833	0.637569	1.65147	1.53614	0	0	0.0299221	0	0	1.13395	0.0931058	8.26047	12.982	1.13395	1.3627	2.28034
DEV_4	Developing Zoospore	22.2224	0	1.2759	0.387154	1.59648	0.0429936	0.0620904	1.89989	1.48735	0	0	0.0277896	0	0	1.94059	0.140938	8.86117	13.3612	1.94059	1.2759	2.57376
DEV_5	Developing Zoospore	20.7963	0	1.521	0.260482	1.20187	0.0964753	0.0450432	1.71464	1.49823	0	0	0.0263556	0	0	1.6296	0.149556	8.14324	12.6531	1.6296	1.521	2.18115
Mean	Developing Zoospore	21.4555	0	1.45085	0.346023	1.19008	0.0786119	0.194408	1.80299	1.54398	0	0	0.0276438	0	0	1.80885	0.135169	8.57861	12.8768	1.80885	1.45085	2.56306
Standard Deviation	Developing Zoospore	0.58965	0	0.183403	0.0717473	0.334427	0.0333753	0.252783	0.112966	0.0572966	0	0	0.00311783	0	0	0.472489	0.0244083	0.63165	0.388966	0.472489	0.183403	0.445017
Number
Replicate Name	Life Stage	Total Volume	Cell Wall	Cytosolic Lipid	Endomembrane	Glycogen	Golgi Apparatus	Microbodies	Mitochondria	Nucleus	Peripheral Bodies	Ribosome Cluster	Rumpsome	Striated Inclusion	Vacuole-bound Lipid	Vacuoles	Vesicles	Total Assigned Organelles	Unassigned Cytosol	Vacuoles + Lipid Contents	Total Lipid Fraction	Total Endomembrane Fraction
ZOO_1	Zoospore	NA	0	1	83	364	0	1	1	1	0	1	1	0	0	10	0	463	NA	10	1	81
ZOO_2	Zoospore	NA	0	1	50	328	0	1	6	1	0	1	1	1	0	9	0	399	NA	9	1	102
ZOO_3	Zoospore	NA	0	1	55	235	0	2	1	1	0	1	1	0	0	6	0	303	NA	6	1	81
ZOO_4	Zoospore	NA	0	1	48	291	0	1	1	1	0	1	1	1	0	8	0	354	NA	8	1	60
ZOO_5	Zoospore	NA	0	1	49	438	0	2	5	1	0	1	1	1	0	7	0	506	NA	7	1	53
Mean	Zoospore	NA	0	1	57	331.2	0	1.4	2.8	1	0	1	1	0.6	0	8	0	405	NA	8	1	75.4
Standard Deviation	Zoospore	NA	0	0	14.7817	76.4245	0	0.547723	2.48998	0	0	0	0	0.547723	0	1.58114	0	81.5567	NA	1.58114	0	19.4242
GERM_1	Germling	NA	1	1	109	202	0	1	1	1	1	0	1	0	0	6	0	324	NA	6	1	117
GERM_2	Germling	NA	1	1	95	217	3	2	1	1	4	0	1	0	0	3	0	329	NA	3	1	107
GERM_3	Germling	NA	1	1	89	155	0	1	1	1	6	0	1	0	0	9	0	265	NA	9	1	105
GERM_4	Germling	NA	1	1	59	189	2	1	2	1	2	0	0	0	0	2	0	260	NA	2	1	66
GERM_5	Germling	NA	1	1	92	76	2	2	1	1	5	0	1	0	0	1	0	183	NA	1	1	102
Mean	Germling	NA	1	1	88.8	167.8	1.4	1.4	1.2	1	3.6	0	0.8	0	0	4.2	0	272.2	NA	4.2	1	99.4
Standard Deviation	Germling	NA	0	0	18.3358	56.1934	1.34164	0.547723	0.447214	0	2.07364	0	0.447214	0	0	3.27109	0	59.3018	NA	3.27109	0	19.5013
IMM_1	Immature Thallus	NA	1	37	1070	1288	82	0	151	1	42	0	0	0	38	94	0	2804	NA	94	75	1288
IMM_2	Immature Thallus	NA	1	161	1932	1004	63	28	328	2	77	0	0	0	68	32	0	3696	NA	32	229	2132
IMM_3	Immature Thallus	NA	1	80	1637	1029	60	11	411	1	36	0	0	0	39	32	0	3337	NA	32	119	1776
IMM_4	Immature Thallus	NA	1	34	2257	1122	61	15	201	4	29	0	0	0	136	76	0	3936	NA	76	170	2438
IMM_5	Immature Thallus	NA	1	32	673	932	45	0	95	1	79	0	0	0	72	115	0	2045	NA	115	104	912
Mean	Immature Thallus	NA	1	68.8	1513.8	1075	62.2	10.8	237.2	1.8	52.6	0	0	0	70.6	69.8	0	3163.6	NA	69.8	139.4	1709.2
Standard Deviation	Immature Thallus	NA	0	55.2331	641.545	137.099	13.1795	11.6919	129.82	1.30384	23.6495	0	0	0	39.8347	37.1645	0	756.752	NA	37.1645	60.789	617.922
IMM_1_APO	Immature Thallus (Apophysis)	NA	1	8	81	0	3	0	17	0	6	0	0	0	4	9	0	129	NA	9	12	99
IMM_2_APO	Immature Thallus (Apophysis)	NA	1	39	6	0	1	0	18	0	0	0	0	0	7	14	0	86	NA	14	46	21
IMM_3_APO	Immature Thallus (Apophysis)	NA	1	5	60	0	1	0	19	0	0	0	0	0	2	15	0	103	NA	15	7	76
IMM_4_APO	Immature Thallus (Apophysis)	NA	1	9	9	0	1	0	2	0	0	0	0	0	6	15	0	43	NA	15	15	25
IMM_5_APO	Immature Thallus (Apophysis)	NA	1	7	69	0	3	0	82	0	0	0	0	0	3	46	0	211	NA	46	10	118
Mean	Immature Thallus (Apophysis)	NA	1	13.6	45	0	1.8	0	27.6	0	1.2	0	0	0	4.4	19.8	0	114.4	NA	19.8	18	67.8
Standard Deviation	Immature Thallus (Apophysis)	NA	0	14.2759	35.05	0	1.09545	0	31.1978	0	2.68328	0	0	0	2.07364	14.856	0	62.4083	NA	14.856	15.9217	43.5396
DEV_1	Developing Zoospore	NA	0	1	126	100	2	1	12	1	0	0	1	0	0	4	58	306	NA	4	1	191
DEV_2	Developing Zoospore	NA	0	1	75	135	2	1	12	1	0	0	1	0	0	6	60	294	NA	6	1	144
DEV_3	Developing Zoospore	NA	0	1	83	62	1	1	7	1	0	0	1	0	0	21	38	216	NA	21	1	144
DEV_4	Developing Zoospore	NA	0	1	85	104	1	2	9	1	0	0	1	0	0	24	57	285	NA	24	1	169
DEV_5	Developing Zoospore	NA	0	1	73	56	1	1	5	1	0	0	1	0	0	6	55	200	NA	6	1	136
Mean	Developing Zoospore	NA	0	1	88.4	91.4	1.4	1.2	9	1	0	0	1	0	0	12.2	53.6	260.2	NA	12.2	1	156.8
Standard Deviation	Developing Zoospore	NA	0	0	21.6287	32.6006	0.547723	0.447214	3.08221	0	0	0	0	0	0	9.49737	8.90505	48.5613	NA	9.49737	0	22.7969
Percentage Volume (%)
Replicate Name	Life Stage	Total Volume	Cell Wall	Cytosolic Lipid	Endomembrane	Glycogen	Golgi Apparatus	Microbodies	Mitochondria	Nucleus	Peripheral Bodies	Ribosome Cluster	Rumpsome	Striated Inclusion	Vacuole-bound Lipid	Vacuoles	Vesicles	Total Assigned Organelles	Unassigned Cytosol	Vacuoles + Lipid Contents	Total Lipid Fraction	Total Endomembrane Fraction
ZOO_1	Zoospore	100	0	2.18049	1.07797	0.845276	0	1.3451	8.71342	9.37742	0	17.1359	0.253949	0	0	1.62304	0	42.5525	57.4475	1.62304	2.18049	4.0461
ZOO_2	Zoospore	100	0	6.40401	0.522171	3.69241	0	1.42669	10.2195	10.025	0	18.3633	0.219704	0.204089	0	3.13803	0	54.215	45.785	3.13803	6.40401	5.08689
ZOO_3	Zoospore	100	0	2.72344	1.33069	0.813101	0	0.266486	10.2311	10.3858	0	24.2808	0.303085	0	0	0.906078	0	51.2406	48.7594	0.906078	2.72344	2.50326
ZOO_4	Zoospore	100	0	2.3629	1.17686	1.04063	0	2.09594	9.31119	12.2804	0	21.3593	0.267479	0.30503	0	1.48254	0	51.6822	48.3178	1.48254	2.3629	4.75534
ZOO_5	Zoospore	100	0	7.77861	0.630417	1.55898	0	0.124211	8.33814	9.41711	0	21.1454	0.2481	0.226527	0	4.46144	0	53.929	46.071	4.46144	7.77861	5.21607
Mean	Zoospore	100	0	4.28989	0.947622	1.59008	0	1.05169	9.36266	10.2972	0	20.4569	0.258463	0.147129	0	2.32223	0	50.7238	49.2762	2.32223	4.28989	4.32153
Standard Deviation	Zoospore	100	0	2.61043	0.352814	1.21255	0	0.835754	0.860529	1.18695	0	2.79834	0.0304236	0.139441	0	1.45269	0	4.75438	4.75438	1.45269	2.61043	1.11312
GERM_1	Germling	100	6.68358	2.51371	3.16893	1.36558	0	1.47646	8.97521	11.8214	1.76097	0	0.0911364	0	0	7.43506	0	45.2921	54.7079	7.43506	2.51371	13.8414
GERM_2	Germling	100	8.80932	10.4195	0.6875	0.790764	0.712177	0.706975	8.47674	12.4173	1.37111	0	0.0743459	0	0	6.19453	0	50.6602	49.3398	6.19453	10.4195	9.67229
GERM_3	Germling	100	6.37369	4.13894	1.29296	1.01521	0	0.947549	10.1763	12.4207	1.59425	0	0.0938204	0	0	8.45815	0	46.5115	53.4885	8.45815	4.13894	12.2929
GERM_4	Germling	100	7.24547	8.85166	0.260418	1.77017	0.423324	0.901592	8.39839	11.4243	1.6262	0	0	0	0	7.99624	0	48.8978	51.1022	7.99624	8.85166	10.3062
GERM_5	Germling	100	9.10899	2.6465	1.44627	1.38371	0.470797	0.855454	9.40312	12.6705	2.12554	0	0.0945046	0	0	7.71651	0	47.9219	52.0781	7.71651	2.6465	12.6146
Mean	Germling	100	7.64421	5.71406	1.37122	1.26509	0.32126	0.977606	9.08594	12.1508	1.69561	0	0.0707615	0	0	7.5601	0	47.8567	52.1433	7.5601	5.71406	11.7455
Standard Deviation	Germling	100	1.2449	3.67827	1.11185	0.376399	0.313054	0.29313	0.73238	0.512389	0.278167	0	0.0404061	0	0	0.851701	0	2.08174	2.08174	0.851701	3.67827	1.71884
IMM_1	Immature Thallus	100	2.19168	0.377157	2.89631	12.1227	0.443988	0	7.13578	5.47126	0.41726	0	0	0	4.72281	11.1011	0	46.88	53.12	15.8239	5.09996	19.5814
IMM_2	Immature Thallus	100	1.99353	0.49323	3.26153	10.1201	0.268356	0.227846	7.02475	2.01696	0.224353	0	0	0	4.47668	12.0253	0	42.1327	57.8673	16.502	4.96991	20.484
IMM_3	Immature Thallus	100	2.61929	0.263284	2.05482	7.89372	0.351523	0.329105	7.13691	7.25614	0.397648	0	0	0	5.18392	12.0058	0	45.4922	54.5078	17.1898	5.4472	20.3229
IMM_4	Immature Thallus	100	2.42214	0.106084	3.1874	7.12166	0.480449	0.275843	6.80154	8.6034	0.23072	0	0	0	2.64913	15.301	0	47.1793	52.8207	17.9501	2.75521	22.1245
IMM_5	Immature Thallus	100	2.81726	0.46602	2.05415	9.73498	0.526861	0	6.92787	5.39868	0.412183	0	0	0	1.41239	14.3581	0	44.1085	55.8915	15.7705	1.87841	18.7637
Mean	Immature Thallus	100	2.40878	0.341155	2.69084	9.39865	0.414236	0.166559	7.00537	5.74929	0.336433	0	0	0	3.68898	12.9583	0	45.1585	54.8415	16.6472	4.03014	20.2553
Standard Deviation	Immature Thallus	100	0.328218	0.159167	0.596734	1.96874	0.103884	0.156208	0.143387	2.47725	0.099694	0	0	0	1.59595	1.78006	0	2.08669	2.08669	0.929995	1.60399	1.24799
IMM_1_APO	Immature Thallus (Apophysis)	100	11.1506	0.262112	8.89214	0	1.57789	0	9.84621	0	3.46718	0	0	0	1.61552	9.67804	0	46.4897	53.5103	11.2936	1.87763	25.2308
IMM_2_APO	Immature Thallus (Apophysis)	100	11.5585	5.44675	15.6989	0	0.460859	0	3.42612	0	0	0	0	0	1.17314	14.4652	0	52.2295	47.7705	15.6383	6.61989	31.7981
IMM_3_APO	Immature Thallus (Apophysis)	100	11.2541	0.114386	5.23156	0	0.419445	0	6.40617	0	0	0	0	0	0.861502	37.6749	0	61.962	38.038	38.5364	0.975888	44.1874
IMM_4_APO	Immature Thallus (Apophysis)	100	11.0695	0.482141	18.218	0	0.989541	0	1.21743	0	0	0	0	0	0.883866	6.01168	0	38.8722	61.1278	6.89555	1.36601	26.1031
IMM_5_APO	Immature Thallus (Apophysis)	100	10.1391	0.234002	12.736	0	1.78863	0	11.2471	0	0	0	0	0	0.747537	5.11604	0	42.0084	57.9916	5.86358	0.981539	20.3882
Mean	Immature Thallus (Apophysis)	100	11.0344	1.30788	12.1553	0	1.04727	0	6.4286	0	0.693436	0	0	0	1.05631	14.5892	0	48.3124	51.6876	15.6455	2.36419	29.5415
Standard Deviation	Immature Thallus (Apophysis)	100	0.533652	2.31751	5.20185	0	0.627008	0	4.21513	0	1.55057	0	0	0	0.349783	13.4201	0	9.13557	9.13557	13.3714	2.40745	9.13484
DEV_1	Developing Zoospore	100	0	7.93334	2.0356	4.65171	0.536244	0.776092	8.6404	7.16689	0	0	0.141676	0	0	11.0567	0.704332	43.643	56.357	11.0567	7.93334	15.109
DEV_2	Developing Zoospore	100	0	6.42723	1.4814	3.47307	0.209552	0.271562	8.79286	7.71301	0	0	0.109502	0	0	9.08579	0.653495	38.2175	61.7825	9.08579	6.42723	11.7018
DEV_3	Developing Zoospore	100	0	6.41496	1.52447	6.5901	0.432545	3.00138	7.77435	7.23146	0	0	0.140859	0	0	5.33811	0.4383	38.8865	61.1135	5.33811	6.41496	10.7348
DEV_4	Developing Zoospore	100	0	5.7415	1.74218	7.1841	0.19347	0.279405	8.54944	6.69301	0	0	0.125052	0	0	8.73257	0.634214	39.8749	60.1251	8.73257	5.7415	11.5818
DEV_5	Developing Zoospore	100	0	7.31379	1.25254	5.77923	0.463906	0.216592	8.24491	7.20431	0	0	0.126732	0	0	7.83598	0.719148	39.1571	60.8429	7.83598	7.31379	10.4882
Mean	Developing Zoospore	100	0	6.76617	1.60724	5.53564	0.367143	0.909007	8.40039	7.20174	0	0	0.128764	0	0	8.40983	0.629898	39.9558	60.0442	8.40983	6.76617	11.9231
Standard Deviation	Developing Zoospore	100	0	0.858827	0.295889	1.49367	0.155911	1.19142	0.403098	0.361354	0	0	0.0132474	0	0	2.08157	0.112685	2.14505	2.14505	2.08157	0.858827	1.8565
