# Supplementary material for: A cellular and molecular atlas reveals the basis of chytrid development
Source: eLife. 2022 Mar 1;11:e73933. doi: 10.7554/eLife.73933 (PMC8887899; doi:10.7554/eLife.73933)
Supplement: Figure 3—source data 1. [file elife-73933-fig3-data1.xlsx]

## Sheet: Ribosome GvZ DOWN (Fig 3C)
	fpkm						normalised read counts
Locus tag	IMA_1_fpkm	IMA_2_fpkm	IMA_3_fpkm	GER_1_fpkm	GER_2_fpkm	GER_3_fpkm	IMA_1	IMA_2	IMA_3	GER_1	GER_2	GER_3	log2FoldChange	pvalue	padj	Annotation
BCR33DRAFT_715367	193.306	172.564	196.353	4566.91	2668.03	2181.88	818.283	722.042	840.134	15724	9156.39	7513.34	-3.76622	2.44956e-35	2.57331e-34	glucocorticoid receptor-like (DNA-binding domain)
BCR33DRAFT_723341	39.8951	37.8384	48.8068	380.292	284.765	286.692	229.543	215.195	283.843	1779.68	1328.33	1341.85	-2.60939	3.20864e-34	3.26852e-33	ribosomal protein S5 domain 2-like protein
BCR33DRAFT_656422	95.702	82.1363	131.706	1189.24	895.749	1040.31	84.7543	71.9003	117.896	856.63	643.138	749.457	-3.03289	3.5439e-32	3.4111e-31	large subunit ribosomal protein 29
BCR33DRAFT_491831	1619.01	1554.23	1817.13	8000.63	7282.21	6461.82	8783.17	8334.36	9964.21	35302.8	32029	28516.9	-1.82338	1.76403e-30	1.61374e-29	60S ribosomal protein L7
BCR33DRAFT_852436	3299.27	3298.63	3547.72	23129.7	18368.6	15822.1	36771.3	36339.6	39966.3	209673	165975	143450	-2.19869	3.30678e-30	2.99784e-29	ribosomal protein L1
BCR33DRAFT_712211	4889.16	5015.55	5303.45	42105.4	29678.4	26587.4	23419.4	23747.4	25677.6	164045	115255	103601	-2.39406	2.2981e-27	1.92611e-26	ribosomal protein L15e
BCR33DRAFT_711123	4.01506	1.91853	1.03246	76.4643	83.4845	129.197	17.1527	8.10145	4.45826	265.693	289.149	448.991	-5.08088	4.07608e-27	3.3989e-26	hypothetical protein
BCR33DRAFT_763873	54.6811	56.2983	60.6868	541.396	376.951	324.048	180.607	183.802	202.603	1454.44	1009.39	870.667	-2.55421	2.26369e-25	1.76095e-24	hypothetical protein
BCR33DRAFT_742301	1232.32	1282.98	1420.43	5599.72	4880.64	4497.15	4262.44	4386.43	4966.01	15753.7	13686.4	12653.7	-1.62829	5.57402e-25	4.26517e-24	ribosomal protein S8e
BCR33DRAFT_2573	4613.17	4258.73	4784.27	25560.6	19929.4	17963.7	14363.3	13106.6	15056.5	64730.5	50306.7	45498.3	-1.91642	1.04344e-23	7.61084e-23	hypothetical protein
BCR33DRAFT_759481	233.891	258.952	270.473	1189.18	1030.42	896.827	1250.63	1368.64	1461.81	5171.84	4466.92	3900.93	-1.72974	1.38385e-23	1.00602e-22	ribosomal protein S2
BCR33DRAFT_757694	2975.97	2611.35	3038.49	8538.36	9633.43	9439.66	14652.9	12709.1	15121.9	34194.2	38455.1	37809.1	-1.37855	1.98456e-22	1.38433e-21	hypothetical protein
BCR33DRAFT_752881	10919.1	10495.8	11476.9	62496	45979.7	43626.1	27185.5	25830	28882.1	126557	92809.9	88357.3	-1.90972	2.04834e-22	1.4273e-21	hypothetical protein
BCR33DRAFT_712021	2235.57	2050.25	2229.64	12296.5	9014.18	8468.12	7869.54	7133.83	7933.23	35206.6	25725.5	24248.9	-1.8928	2.82316e-21	1.87543e-20	ribosomal protein S4
BCR33DRAFT_306404	4286.44	4034.28	4231.29	61666.5	30224.7	29083.8	27862	25920.1	27799.7	326021	159277	153784	-2.96967	4.75753e-20	3.02248e-19	40S ribosomal protein S12-like protein
BCR33DRAFT_357485	39.2565	29.6173	61.6771	350.728	334.046	332.994	180.607	134.687	286.815	1312.43	1245.97	1246.25	-2.65939	9.3559e-19	5.63764e-18	ribosomal protein S5 domain 2-like protein
BCR33DRAFT_729642	1893.65	1785.94	1892.98	9363.56	6842.1	6518.34	10199.3	9508.06	10305.5	41019.7	29877	28559.6	-1.72841	1.16317e-18	6.96414e-18	60S ribosomal protein L6
BCR33DRAFT_759004	6500.89	5840.57	6517.46	17082.1	20214.5	20867.2	35810.7	31801.7	36288.8	76535.5	90277.7	93507.9	-1.3251	1.76598e-18	1.0468e-17	40S ribosomal protein S2
BCR33DRAFT_724703	5734.15	5433.96	5986.62	17671.9	15948.6	14899.3	31395.4	29408.2	33130.8	78697.7	70794.3	66360.2	-1.20029	2.51519e-18	1.47555e-17	ribosomal protein L18ae
BCR33DRAFT_758229	6237.99	6176.67	6339.01	34339.5	23800.4	22831.8	19109.6	18703.2	19628.2	85562.2	59110.9	56897.2	-1.8111	7.7168e-18	4.42989e-17	hypothetical protein
BCR33DRAFT_719362	2750.66	2643.8	2816.11	16025.9	10840	10444.2	14079.8	13376.5	14570.1	66720.9	44984.6	43489	-1.88467	8.55625e-18	4.89462e-17	hypothetical protein
BCR33DRAFT_722253	4600.02	4395.02	4624.77	27541.8	18126.8	17216	26441.3	24971.2	26869.9	128765	84473.7	80500.9	-1.90775	1.32888e-16	7.18164e-16	ribosomal protein S11e
BCR33DRAFT_757040	10039.1	9616.79	10363.3	47918.9	34490.3	33025.7	44733.1	42356.4	46675	173669	124597	119710	-1.64371	2.40775e-16	1.28374e-15	ribosomal protein L6
BCR33DRAFT_657836	6298.51	6242.4	6598.64	41846.1	27417.1	24507.5	31363.1	30724.7	33211.6	169480	110683	99271.4	-1.99329	3.15706e-16	1.67507e-15	L30e-like protein
BCR33DRAFT_724782	1229.27	1128.75	1239.7	6146.98	4293.54	4098.99	6668.85	6052.79	6797.86	27123.6	18884.1	18089.4	-1.71524	8.2338e-16	4.27179e-15	60S ribosomal protein L6
BCR33DRAFT_703408	5027.32	4882.19	5060.17	25676	17645.9	17002.6	22093.1	21207.6	22477.1	91776.2	62869.8	60782.8	-1.71151	8.9827e-16	4.64745e-15	ribosomal protein L22
BCR33DRAFT_701150	7068.48	6783.5	7092.67	25249.9	20067.1	19161.9	21653.7	20540.7	21961.9	62914.2	49838.8	47751.8	-1.32291	1.84783e-15	9.41525e-15	ribosomal protein L5
BCR33DRAFT_666409	4259.65	4032.6	4771.9	34196.7	21742	17454.2	18007.8	16851	20390.6	117585	74518.2	60024.8	-2.1901	9.00777e-15	4.43282e-14	ribosomal protein S3Ae
BCR33DRAFT_678296	3916.86	3770.75	4291.65	17728.5	13223.8	11988.7	19111.1	18185.7	21165.3	70355.9	52309.7	47584.5	-1.54204	5.12557e-14	2.41703e-13	60S ribosomal protein L2
BCR33DRAFT_765641	30.0616	33.8278	31.0994	1105.61	900.493	165.655	116.537	129.623	121.859	3486.07	2830.16	522.4	-4.21556	9.08011e-14	4.24062e-13	hypothetical protein
BCR33DRAFT_752583	8254.12	8172.33	8766.07	49333.9	31800.8	29009.8	25791.5	25241.1	27686.3	125382	80560.5	73738.7	-1.82898	1.04089e-13	4.84739e-13	ribosomal protein L18e
BCR33DRAFT_693970	3335.68	3139	3385.9	16147.8	10845.5	10601.5	15755.2	14655	16164.7	62034.6	41530.6	40733.6	-1.63139	1.19176e-13	5.5401e-13	ribosomal protein S11e
BCR33DRAFT_638768	15235	15393.2	16024.9	76920.7	53118.7	48756.1	46840.9	46780.8	49800.3	192357	132406	121943	-1.63904	1.24581e-13	5.78726e-13	60S ribosomal protein L19
BCR33DRAFT_656741	1295.8	1038.73	1168.42	8921.41	5542.62	4539.52	2403.39	1904.35	2190.49	13458.7	8334.51	6849.25	-2.13984	1.32431e-13	6.13669e-13	ribosomal protein L22e
BCR33DRAFT_858416	447.286	365.472	422.474	1074.59	1317.79	1412.12	3714.56	3000.07	3546.3	7258.45	8872.5	9539.78	-1.32316	3.23904e-13	1.47025e-12	hypothetical protein
BCR33DRAFT_758420	30.9204	42.0205	45.663	392.266	219.464	187.743	99.889	134.18	149.104	1030.7	574.794	493.378	-2.45127	6.38162e-13	2.84739e-12	hypothetical protein
BCR33DRAFT_483543	2910.51	2895.97	2768.06	11025.9	7703.99	8238.89	5576.63	5484.68	5360.81	17183	11967.3	12841.5	-1.3543	1.22881e-12	5.41273e-12	40S ribosomal protein S29
BCR33DRAFT_556939	8801	8729.85	9337.73	43994.5	29573.5	27524.1	23627.8	23166.1	25338.8	96066.2	64368.1	60110.2	-1.61232	1.63887e-12	7.18273e-12	60S ribosomal protein L33
BCR33DRAFT_718035	4804.12	4563.58	4807.62	24290.5	15382.3	15205.5	27293.4	25627.4	27607.5	112244	70850.3	70273.1	-1.65363	2.609e-12	1.1321e-11	ribosomal protein S4
BCR33DRAFT_684663	20.9487	21.9905	22.9065	107.896	88.0218	66.5162	104.429	108.357	115.419	437.477	355.741	269.736	-1.69104	3.21449e-12	1.38793e-11	ribosomal protein L32e
BCR33DRAFT_711803	4895.1	4764.13	4990.51	27636.2	17584.6	15698.2	28110.2	27042.1	28966.8	129081	81867.8	73332.4	-1.75679	4.12161e-12	1.76852e-11	ribosomal protein S7
BCR33DRAFT_851058	847.903	854.42	931.139	4718.39	3063.91	2760.91	9502.07	9464.52	10547.3	43007.8	27837.2	25169.1	-1.70179	6.21755e-12	2.64534e-11	hypothetical protein
BCR33DRAFT_758772	3027.13	2877.94	3189.74	15474.7	10210.9	9313.51	14129.3	13277.8	15048.6	58747.8	38639.1	35362.7	-1.64463	7.27938e-12	3.08608e-11	ribosomal protein S3
BCR33DRAFT_761918	4332.45	4232.48	4430.24	21689.8	14098.2	12974.4	20053	19364	20726.5	81654.7	52903.8	48851.3	-1.60856	2.20871e-11	9.09021e-11	ribosomal protein L15e
BCR33DRAFT_719278	18.7488	21.1825	24.1135	171.723	104.09	81.8381	71.6376	80.0018	93.1281	533.676	322.445	254.371	-2.17739	3.40921e-11	1.38698e-10	ribosomal protein L13e
BCR33DRAFT_717955	3342.69	3379.17	3432.39	23511.2	13059.9	11760.2	17482.6	17469.2	18145.1	100015	55376.5	50034.3	-1.95189	3.64333e-11	1.47855e-10	40S ribosomal protein S19-A
BCR33DRAFT_639221	16.2773	8.79708	13.262	218.355	130.484	66.62	31.2784	16.7092	25.7588	341.278	203.281	104.139	-3.13212	6.25622e-11	2.50096e-10	ribosomal protein L24
BCR33DRAFT_716088	21564.7	21292.6	22552.4	168135	87208.4	77142.2	77952.8	76080.2	82401.5	494344	255578	226843	-2.04657	1.75937e-10	6.86352e-10	ubiquitin-domain-containing protein
BCR33DRAFT_711991	4315.64	4083.82	4294.57	30716.3	15726	15022.6	22066.4	20640	22195.2	127743	65190	62484.9	-1.97651	2.14883e-10	8.33815e-10	hypothetical protein
BCR33DRAFT_718017	3173.95	2978	3171.2	24138.2	11581.3	11359.7	15062.1	13968.9	15211.1	93168.8	44557	43852.6	-2.03707	5.17875e-10	1.95848e-09	L30e-like protein
BCR33DRAFT_766854	357.577	390.142	346.547	1248.43	956.099	858.817	1069.52	1153.44	1047.69	3037.14	2318.45	2089.6	-1.18586	1.62434e-09	5.98055e-09	hypothetical protein
BCR33DRAFT_715593	23.5969	18.5194	24.2244	105.259	70.1981	69.8703	115.528	89.6223	119.878	419.153	278.635	278.272	-1.58166	2.45737e-09	8.92226e-09	hypothetical protein
BCR33DRAFT_756172	2983.84	2847.79	3080.43	15252.5	8931.26	8688.32	7030.07	6632.05	7335.82	29228.5	17059.8	16651.9	-1.58364	2.55704e-09	9.27388e-09	putative 60S ribosomal protein L14
BCR33DRAFT_712133	2148.21	2065.11	2287.91	11731.4	6746.2	6409.48	9823.43	9334.39	10575	43633.1	25010.5	23842.6	-1.63712	3.30715e-09	1.19037e-08	40S ribosomal protein S6-B
BCR33DRAFT_720175	7.51037	7.72767	6.46903	20.6818	24.2414	20.2035	75.6735	76.9638	65.8832	169.494	198.023	165.597	-1.2884	4.79497e-09	1.7032e-08	hypothetical protein
BCR33DRAFT_733096	14797.2	14794.9	15240.1	50490.2	36614.6	33953.8	31648.7	31278.2	32947	87834.3	63490.2	59075.6	-1.13389	2.05331e-08	6.98115e-08	hypothetical protein
BCR33DRAFT_679044	2918.31	2964.72	3130.33	18536.5	9870.91	8622	8062.25	8095.88	8741.16	41651.9	22108.5	19376.6	-1.73932	3.4519e-08	1.15122e-07	hypothetical protein
BCR33DRAFT_762043	1566.03	1534.77	1567.37	8079.9	4719.32	4111.47	7431.64	7199.15	7518.11	31186.8	18156.8	15871.7	-1.55788	4.83471e-08	1.59453e-07	hypothetical protein
BCR33DRAFT_628309	7867.66	8006.52	8125.68	54177	26538.8	23847.9	10911.6	10975.9	11390.9	61113.9	29840.2	26905.3	-1.82436	5.30815e-08	1.74409e-07	ribosomal protein S25
BCR33DRAFT_675761	1646.31	1675.27	1783.16	9224.48	5215.25	4518.12	8381.09	8430.06	9175.6	38195.6	21525	18710.8	-1.59358	9.19505e-08	2.96469e-07	40S ribosomal protein S17
BCR33DRAFT_755916	3972.18	3854.42	4172.44	20320.4	11656.7	10335.8	13739.3	13178	14587.4	57167.4	32687.9	29082	-1.5188	1.50183e-07	4.73616e-07	ribosomal protein S8e
BCR33DRAFT_724729	6270.9	6421.6	6592	37015.5	19281	17428	31016	31394.6	32955.5	148909	77315	70121.1	-1.63571	2.08554e-07	6.52199e-07	hypothetical protein
BCR33DRAFT_50973	3123.11	3310.55	3361.48	18757.8	10084.6	8627.69	22718.2	23803.6	24715.6	110982	59473.6	51053.5	-1.63663	2.20163e-07	6.86864e-07	ribosomal protein S2
BCR33DRAFT_717194	2353.85	2433.01	2736.18	13021.2	7934.4	6058.25	4326.51	4420.35	5083.41	19466.6	11823.6	9058.35	-1.54455	4.13745e-07	1.26224e-06	40S ribosomal protein S26-A
BCR33DRAFT_754556	2438.37	2551.17	2552.61	15614.9	7868.5	6682.3	6356.07	6573.31	6725.53	33106.2	16628.7	14169.7	-1.70094	4.51941e-07	1.37556e-06	hypothetical protein
BCR33DRAFT_738566	2927.55	2946.43	3162.29	13364.1	8231.35	7010.64	7044.19	7007.75	7690.99	26154.7	16057.4	13722.4	-1.36308	7.13126e-07	2.14117e-06	40S ribosomal protein S17-B
BCR33DRAFT_658944	11007	11279.9	11355.5	63759	31954.3	29367	27036.6	27386.9	28193	127381	63633.9	58679.5	-1.59564	8.42981e-07	2.51493e-06	40S ribosomal protein S23
BCR33DRAFT_727011	6876.93	6706.47	7410.59	21939.7	16227	14333.2	16891.8	16282.9	18398.7	43832.4	32314.6	28639.8	-1.02269	1.18229e-06	3.46643e-06	ribosomal protein S24
BCR33DRAFT_701754	3201.64	3144.04	3159.71	17403.2	8821.14	7874.55	15942.4	15474.8	15903.1	70484.1	35610.9	31897.1	-1.54402	2.10925e-06	6.0648e-06	40S ribosomal protein S23
BCR33DRAFT_722121	4563.27	4632.33	4790.5	15184.1	10472.4	9679.2	15605.9	15659.1	16559.5	42236	29035.8	26927.5	-1.0379	2.40336e-06	6.87275e-06	hypothetical protein
BCR33DRAFT_759628	74.6961	73.0491	83.7386	361.78	193.691	195.47	232.57	224.815	263.533	916.181	488.925	495.085	-1.39533	3.67917e-06	1.03361e-05	putative ribosomal protein
BCR33DRAFT_701704	1442.02	1461.04	1451.74	4254.44	2971.43	2944.39	9525.78	9539.96	9693.25	22858.7	15913.7	15822.2	-0.924618	4.49244e-06	1.25241e-05	ribosomal protein S4
BCR33DRAFT_758382	4679.17	4617.38	4914.36	11824.3	9815	8554.75	13057.2	12736	13861.2	26837.2	22204.9	19419.3	-0.787713	6.77988e-06	1.85886e-05	hypothetical protein
BCR33DRAFT_725115	3529.76	3342.39	3780.71	10253.9	7715.77	6699.26	8670.16	8115.12	9386.62	20485.8	15365.2	13386.1	-0.911597	1.5386e-05	4.09834e-05	ribosomal protein S24
BCR33DRAFT_661528	38.5282	33.4019	36.3336	261.597	95.5711	105.912	86.2678	73.9257	82.2301	476.414	173.49	192.912	-1.79247	2.03998e-05	5.37051e-05	ribosomal protein L32e
BCR33DRAFT_696192	668.27	640.505	707.72	3338.08	1714.53	1460.72	4380.99	4150.47	4689.59	17799.1	9112.58	7789.91	-1.39201	2.82882e-05	7.34541e-05	ribosomal protein S7e
BCR33DRAFT_758850	923.286	950.083	1032.81	4262.53	2294.57	1956.87	3532.94	3593.5	3994.6	13266.3	7118.33	6091.26	-1.25117	8.47184e-05	0.000209398	hypothetical protein
BCR33DRAFT_682469	0.503995	0.0731077	0.349716	2.81328	3.70184	2.6956	3.53143	0.50634	2.47681	16.0332	21.029	15.3647	-3.01001	0.00014526	0.00034967	hypothetical protein
BCR33DRAFT_698439	1962.71	2167.04	2124.37	10496.9	4821.07	4000.73	5323.88	5810.26	5824.47	23158.8	10602.1	8827.88	-1.32833	0.000343128	0.000790118	hypothetical protein
BCR33DRAFT_712720	9514.2	9415.38	10016	30578.9	18692.5	16976.9	35187.2	34419.5	37442	91984.6	56047.6	51075.7	-0.895254	0.000682182	0.00151854	putative 40s ribosomal protein s20
BCR33DRAFT_855334	566.857	725.924	638.583	1891.7	1271.05	1098.32	3750.88	4747.95	4271.01	10181.1	6818.67	5912	-0.843092	0.000945271	0.00206729	ribosomal protein S4
BCR33DRAFT_711138	1356.53	1379.54	1415.86	5583.17	2803.72	2473.17	6860.56	6896.36	7237.74	22966.4	11495.9	10174.9	-1.0881	0.00101989	0.00222047	40S ribosomal protein S15
BCR33DRAFT_848277	21163.8	20979.4	20914.1	52976.5	36427.4	35529.9	50334.5	49319.6	50276.3	102479	70238.7	68740	-0.687452	0.00103176	0.00224369	ribosomal protein L37a
BCR33DRAFT_701696	2235.57	2239.64	2297.65	7151.31	4289.3	3835.45	14643.3	14500.6	15212.1	38099.4	22778	20436.8	-0.874301	0.00129622	0.00278232	ribosomal protein S4
BCR33DRAFT_716992	746.161	785.197	798.11	3753.32	1614.19	1350.5	3648.98	3795.53	3945.06	14929.2	6399.84	5372.53	-1.22902	0.00159339	0.00338305	40S ribosomal protein S6-B
BCR33DRAFT_849161	181.789	112.984	109.582	324.46	843.478	232.767	717.889	441.022	437.405	1042.16	2700.48	747.749	-1.49237	0.00194257	0.00407816	hypothetical protein
BCR33DRAFT_632056	10550.7	10849.1	11047.7	37819.5	19982	18653.1	14632.7	14872.7	15487	42662	22467.8	21044.5	-0.937506	0.00209699	0.00438198	ribosomal protein S25
BCR33DRAFT_701695	877.407	598.896	797.508	1377.47	2669.68	1403.01	5747.15	3877.55	5280.07	7338.61	14177.1	7475.79	-0.959933	0.00294614	0.00602473	ribosomal protein S4
BCR33DRAFT_717173	4898.17	4830.61	5053.77	15090.3	8100.46	7191.82	6247.6	6090.26	6515.5	15655.3	8376.57	7462.13	-0.740068	0.0167148	0.0302187	60S ribosomal protein L39
BCR33DRAFT_658517	290.389	71.9034	294.895	690.458	528.411	572.409	800.626	195.954	821.806	1548.35	1181.13	1283.81	-1.14192	0.019036	0.0340206	hypothetical protein

## Sheet: Peroxisome GvZ DOWN (Fig 3C)
	fpkm						normalised read counts
Locus tag	IMA_1_fpkm	IMA_2_fpkm	IMA_3_fpkm	GER_1_fpkm	GER_2_fpkm	GER_3_fpkm	IMA_1	IMA_2	IMA_3	GER_1	GER_2	GER_3	log2FoldChange	pvalue	padj	Annotation
BCR33DRAFT_753632	19.4785	17.3296	16.3092	2033.22	1972.57	1810.23	211.886	186.333	179.321	17989.2	17396.3	16018.6	-6.47584	0	0	Acyl-CoA synthetase
BCR33DRAFT_741044	31.9387	24.8345	22.28	939.912	996.677	941.217	359.701	276.462	253.625	8609.82	9100.32	8623.02	-4.88737	1.66689e-152	9.13652e-151	Carnitine O-acyltransferase CRAT
BCR33DRAFT_718781	29.129	30.7304	26.9396	516.069	406.414	404.036	336.495	350.894	314.555	4848.89	3806.26	3796.79	-3.63501	3.1249e-99	1.02855e-97	Long-chain acyl-CoA transporter, ABC superfamily (involved in peroxisome organization and biogenesis)
BCR33DRAFT_721418	4.62878	5.37717	4.80145	117.365	83.5314	74.2474	59.5298	68.356	62.4156	1227.68	870.953	776.772	-3.91548	2.89505e-57	4.96403e-56	Acyl-CoA oxidase
BCR33DRAFT_758705	2.30032	1.31385	1.39664	44.9411	73.3033	81.0387	16.1437	9.11413	9.90725	256.531	417.076	462.649	-5.01731	1.55215e-42	1.96836e-41	Ubiquitin-specific protease
BCR33DRAFT_683445	1.38571	1.27913	1.59089	21.0954	18.3513	20.0882	16.6482	15.1902	19.3191	206.141	178.747	196.327	-3.50338	6.06104e-40	7.25774e-39	Peroxisomal long-chain acyl-CoA transporter, ABC superfamily
BCR33DRAFT_782173	6.83666	6.94191	5.7339	43.6137	47.3042	55.4667	81.2229	81.5208	68.8554	421.443	455.629	536.058	-2.61168	1.87683e-38	2.14168e-37	Long-chain acyl-CoA synthetases (AMP-forming)
BCR33DRAFT_703686	3.77927	2.9751	3.7951	52.1468	53.4901	33.7393	44.8996	34.9375	45.5733	503.9	515.211	326.073	-3.42121	3.30658e-35	3.46252e-34	Acyl-CoA synthetase
BCR33DRAFT_711512	1.04437	1.73527	1.15289	20.4037	20.7462	20.3401	11.0988	18.2283	12.3841	176.365	178.747	175.841	-3.67087	8.70372e-35	9.02761e-34	Pristanoyl-CoA/acyl-CoA oxidase
BCR33DRAFT_654674	4.62792	5.37048	4.38872	78.1138	62.3188	51.7965	21.1886	24.3043	20.3099	290.888	231.319	192.912	-3.43707	9.21302e-35	9.54075e-34	TPR repeat-containing protein
BCR33DRAFT_763286	1.43235	1.58273	1.02312	15.9907	22.2016	20.6794	17.1527	18.7346	12.3841	155.751	215.548	201.448	-3.5741	4.2875e-32	4.11475e-31	Acyl-CoA oxidase
BCR33DRAFT_714229	3.4156	5.22316	4.35745	44.1039	32.0899	42.4547	41.8727	63.2926	53.9945	439.767	318.94	423.383	-2.89128	6.58176e-29	5.76344e-28	Long-chain acyl-CoA synthetases (AMP-forming)
BCR33DRAFT_845275	1.14778	0.658735	0.533264	34.5415	16.0362	23.2506	11.6033	6.58243	5.44898	284.016	131.431	191.205	-4.67833	1.19308e-25	9.38136e-25	Carnitine O-acyltransferase CRAT
BCR33DRAFT_753456	0.871333	1.15017	0.84645	9.24113	11.9466	16.311	10.0898	13.1649	9.90725	87.0372	112.155	153.647	-3.41912	4.02827e-20	2.56665e-19	Peroxisomal long-chain acyl-CoA transporter, ABC superfamily
BCR33DRAFT_720251	10.3628	12.2238	10.3667	41.3528	40.4325	37.0548	118.555	138.231	119.878	384.796	375.018	344.852	-1.5509	5.17021e-18	2.99557e-17	Acyl-CoA synthetase
BCR33DRAFT_756535	5.39137	6.07158	4.57083	30.0945	23.5198	20.3888	27.7469	30.8868	23.7774	125.975	98.1355	85.3595	-1.90064	4.83749e-10	1.83313e-09	Peroxisomal targeting signal type 2 receptor
BCR33DRAFT_752974	0.0435039	0.0441736	0.0422615	2.67121	0.372792	2.53362	0.50449	0.50634	0.495362	25.195	3.50484	23.9007	-5.11629	2.10816e-05	5.54334e-05	Long-chain acyl-CoA synthetases (AMP-forming)
BCR33DRAFT_759441	7.45238	4.0746	3.43415	17.5996	18.8307	15.1032	39.3502	21.2663	18.3284	75.585	80.6113	64.8732	-1.48495	0.000288672	0.000671568	Peroxisomal targeting signal type 2 receptor
BCR33DRAFT_718396	1.24601	0.8759	0.931095	9.09522	3.69597	3.98714	6.55837	4.55706	4.95362	38.9377	15.7718	17.0719	-2.13358	0.000586078	0.00131331	Reductases with broad range of substrate specificities
BCR33DRAFT_712292	6.16157	7.25746	7.06302	17.8847	12.6719	12.3032	50.449	58.7355	58.4527	119.104	84.1162	81.9451	-0.755117	0.00720746	0.0139136	Peroxisomal biogenesis protein peroxin
BCR33DRAFT_720201	1.24993	1.67712	1.73462	4.23607	3.63403	3.3426	14.1257	18.7346	19.8145	38.9377	33.296	30.7294	-0.958812	0.0185617	0.033241	Carnitine O-acyltransferase CRAT
BCR33DRAFT_683983	0.0438408	0.0890314	0	0.978872	0.563519	0.182374	0.50449	1.01268	0	9.16182	5.25726	1.70719	-3.38579	0.0211231	0.0374898	Acyl-CoA synthetase

## Sheet: ABC Transp. GvZ DOWN (Fig 3C)
	fpkm						normalised read counts
Locus tag	IMA_1_fpkm	IMA_2_fpkm	IMA_3_fpkm	GER_1_fpkm	GER_2_fpkm	GER_3_fpkm	IMA_1	IMA_2	IMA_3	GER_1	GER_2	GER_3	log2FoldChange	pvalue	padj	Annotation
BCR33DRAFT_695890	2.72171	3.08075	3.31582	590.889	953.941	858.346	61.5478	68.8623	75.7904	10868.2	17489.2	15789.8	-7.74211	4.00222e-220	4.22816e-218	P-loop containing nucleoside triphosphate hydrolase protein
BCR33DRAFT_718781	29.129	30.7304	26.9396	516.069	406.414	404.036	336.495	350.894	314.555	4848.89	3806.26	3796.79	-3.63501	3.1249e-99	1.02855e-97	P-loop containing nucleoside triphosphate hydrolase protein
BCR33DRAFT_723119	2.262	2.03087	2.17427	28.8413	41.3173	31.5969	47.9265	42.5326	46.5641	497.028	709.73	544.594	-3.67773	1.28188e-57	2.21538e-56	ABC transporter B family member 11-like protein
BCR33DRAFT_757292	0.845951	1.21441	0.963481	30.4492	29.3713	48.9032	14.6302	20.76	16.8423	428.315	411.819	687.998	-4.87242	6.29374e-52	9.7803e-51	P-loop containing nucleoside triphosphate hydrolase protein
BCR33DRAFT_715970	1.69043	1.87882	1.95283	80.0779	137.417	55.5912	37.3323	41.0136	43.5919	1438.4	2460.4	998.706	-5.32791	4.09049e-50	6.05485e-49	leptomycin B resistance protein pmd1
BCR33DRAFT_664357	16.2493	15.2382	15.2188	127.493	196.373	184.438	323.378	299.754	306.134	2063.7	3168.38	2985.88	-3.14534	4.86315e-48	6.90219e-47	P-loop containing nucleoside triphosphate hydrolase protein
BCR33DRAFT_683445	1.38571	1.27913	1.59089	21.0954	18.3513	20.0882	16.6482	15.1902	19.3191	206.141	178.747	196.327	-3.50338	6.06104e-40	7.25774e-39	hypothetical protein
BCR33DRAFT_678928	5.97062	5.32577	3.90702	35.6422	51.6961	48.8984	145.293	128.104	96.1003	705.46	1019.91	967.977	-2.86734	6.33314e-30	5.69418e-29	hypothetical protein
BCR33DRAFT_721651	37.0384	27.8532	24.7166	216.548	291.838	193.354	564.02	419.25	380.438	2682.12	3602.98	2395.19	-2.67035	2.50605e-26	2.0265e-25	P-loop containing nucleoside triphosphate hydrolase protein
BCR33DRAFT_753456	0.871333	1.15017	0.84645	9.24113	11.9466	16.311	10.0898	13.1649	9.90725	87.0372	112.155	153.647	-3.41912	4.02827e-20	2.56665e-19	hypothetical protein
BCR33DRAFT_694887	0.839078	0.5987	1.01339	6.58251	15.352	15.3771	18.6661	13.1649	22.7867	119.104	276.882	278.272	-3.63004	6.19297e-18	3.57234e-17	P-loop containing nucleoside triphosphate hydrolase protein
BCR33DRAFT_654806	3.82017	4.5797	5.67436	18.9853	34.1085	30.963	78.1959	92.6603	117.401	316.083	566.032	515.571	-2.28024	4.54781e-14	2.14999e-13	P-loop containing nucleoside triphosphate hydrolase protein
BCR33DRAFT_697103	2.63445	3.48176	2.78265	12.9548	12.9896	21.0485	63.5657	83.0398	67.8646	254.24	254.101	413.14	-2.10606	3.36506e-13	1.52534e-12	hypothetical protein
BCR33DRAFT_713260	4.2757	5.49336	5.02246	14.9777	12.5246	14.1567	98.88	125.572	117.401	281.726	234.824	266.322	-1.19308	9.91373e-09	3.44665e-08	P-loop containing nucleoside triphosphate hydrolase protein
BCR33DRAFT_857452	0.740308	0.686339	0.343949	5.03072	6.068	3.21352	11.6033	10.6331	5.44898	64.1327	77.1065	40.9726	-2.71728	1.11516e-08	3.86165e-08	hypothetical protein
BCR33DRAFT_852731	0.249456	0.207242	0.176241	3.67101	1.36031	2.07543	5.54939	4.55706	3.9629	66.4232	24.5339	37.5582	-3.1753	2.59736e-08	8.75816e-08	P-loop containing nucleoside triphosphate hydrolase protein
BCR33DRAFT_753523	0.0246866	0	0.0239816	1.378	1.69235	2.15658	0.50449	0	0.495362	22.9045	28.0387	35.851	-6.44231	2.66453e-08	8.97542e-08	hypothetical protein
BCR33DRAFT_848745	0.0222762	0.0678575	0.0216401	0.373035	1.33622	3.05802	0.50449	1.51902	0.495362	6.87136	24.5339	56.3373	-5.13911	9.57581e-07	2.83295e-06	P-loop containing nucleoside triphosphate hydrolase protein
BCR33DRAFT_695236	0.581757	0.636152	0.825979	2.12327	4.02648	2.6993	13.1167	14.1775	18.8238	38.9377	73.6016	49.5085	-1.82231	1.26068e-05	3.38352e-05	P-loop containing nucleoside triphosphate hydrolase protein
BCR33DRAFT_852898	2.06042	1.92251	1.29832	4.19639	8.58946	14.8258	37.3323	34.4312	23.7774	61.8422	126.174	218.52	-2.09612	1.41005e-05	3.7682e-05	P-loop containing nucleoside triphosphate hydrolase protein
BCR33DRAFT_852885	1.29225	1.59843	1.23252	4.19683	4.22807	4.00731	27.7469	33.9248	26.7496	73.2945	73.6016	69.9948	-1.29398	1.63146e-05	4.32984e-05	P-loop containing nucleoside triphosphate hydrolase protein
BCR33DRAFT_718567	0.72943	0.944979	0.977378	3.79085	3.23307	2.61584	14.6302	18.7346	19.8145	61.8422	52.5726	42.6798	-1.55323	2.84253e-05	7.37806e-05	P-loop containing nucleoside triphosphate hydrolase protein
BCR33DRAFT_758093	3.15934	4.02126	3.47977	8.0725	7.91214	10.2734	71.6376	90.1286	79.7533	148.879	145.451	189.498	-1.00562	3.12448e-05	8.0795e-05	P-loop containing nucleoside triphosphate hydrolase protein
BCR33DRAFT_755910	4.18624	5.53878	4.80609	21.2432	14.1316	15.8313	16.6482	21.7726	19.3191	68.7136	45.5629	51.2157	-1.50766	3.47014e-05	8.94684e-05	canalicular multispecific organic anion transporter 1-like protein
BCR33DRAFT_848182	0.04731	0.0240192	0	1.45246	0.912167	0.295209	1.00898	0.50634	0	25.195	15.7718	5.12157	-4.91381	5.17032e-05	0.000130705	P-loop containing nucleoside triphosphate hydrolase protein
BCR33DRAFT_740457	1.03633	0.795058	1.05148	2.95665	2.4668	3.54463	22.702	17.2156	23.282	52.6804	43.8105	63.166	-1.33793	0.000233079	0.000547782	P-loop containing nucleoside triphosphate hydrolase protein
BCR33DRAFT_846971	0.0451521	0	0	1.26019	0.193458	0.657402	1.00898	0	0	22.9045	3.50484	11.9503	-5.23512	0.00037049	0.000850283	P-loop containing nucleoside triphosphate hydrolase protein
BCR33DRAFT_780958	12.2176	13.2935	11.8687	26.7098	19.2529	23.6438	253.758	272.918	249.167	451.219	324.198	399.483	-0.595349	0.00228245	0.00473702	P-loop containing nucleoside triphosphate hydrolase protein
BCR33DRAFT_849956	0.105565	0.294774	0.384565	1.47316	1.13076	0.878287	2.01796	5.56975	7.43043	22.9045	17.5242	13.6575	-1.83577	0.00847105	0.0161529	P-loop containing nucleoside triphosphate hydrolase protein

## Sheet: Proteasome GvZ (UP) (Fig 3D)
	fpkm						normalised read counts
Locus tag	IMA_1_fpkm	IMA_2_fpkm	IMA_3_fpkm	GER_1_fpkm	GER_2_fpkm	GER_3_fpkm	IMA_1	IMA_2	IMA_3	GER_1	GER_2	GER_3	log2FoldChange	pvalue	padj	Annotation
BCR33DRAFT_735290	66.9377	74.411	61.7748	18.293	12.5475	13.0526	484.31	532.164	451.77	107.651	73.6016	76.8236	2.52351	1.7211e-27	1.44806e-26	26S proteasome subunit P45
BCR33DRAFT_722291	14.8602	16.0359	14.2897	3.35827	3.09327	4.5049	249.218	265.829	242.232	45.8091	42.0581	61.4589	2.33478	1.24129e-19	7.74328e-19	26S proteasome regulatory complex, non-ATPase subcomplex, Rpn1 subunit
BCR33DRAFT_722155	43.4904	42.4568	44.8089	15.3816	9.23991	10.9646	183.13	176.713	190.714	52.6804	31.5436	37.5582	2.19973	9.15932e-15	4.50402e-14	N-terminal nucleophile aminohydrolase
BCR33DRAFT_845226	14.315	14.9979	15.4233	1.81605	3.34549	1.35339	110.988	114.939	120.868	11.4523	21.029	8.53595	3.06864	9.61687e-14	4.48491e-13	PCI-domain-containing protein
BCR33DRAFT_721470	10.3727	11.7895	7.77784	2.91803	2.23981	2.06019	190.193	213.676	144.15	43.5186	33.296	30.7294	2.36446	5.73709e-13	2.56767e-12	26S proteasome regulatory complex, non-ATPase subcomplex, Rpn2/Psmd1 subunit
BCR33DRAFT_699585	22.6181	25.1585	20.2743	6.31267	2.64297	4.27679	110.988	122.028	100.559	25.195	10.5145	17.0719	2.69709	7.47695e-12	3.16574e-11	proteasome subunit alpha type-1
BCR33DRAFT_656788	36.4752	31.9792	23.8209	8.98251	9.84965	6.69415	240.137	208.106	158.516	48.0995	52.5726	35.851	2.15643	1.0957e-11	4.58436e-11	26S proteasome subunit P45
BCR33DRAFT_432151	55.2117	59.6098	49.833	23.4068	13.7743	11.6292	199.274	212.663	181.798	68.7136	40.3057	34.1438	2.08	2.20608e-11	9.0835e-11	N-terminal nucleophile aminohydrolase
BCR33DRAFT_779463	29.9462	24.5086	25.7527	10.9612	6.31019	5.78622	184.643	149.37	160.497	54.9709	31.5436	29.0222	2.12726	5.57969e-11	2.23871e-10	26S proteasome subunit P45
BCR33DRAFT_665420	12.9291	15.5086	15.2513	0.793078	3.95686	2.36414	91.8172	108.863	109.475	4.58091	22.7815	13.6575	2.86585	1.61207e-10	6.29641e-10	26S proteasome subunit P45
BCR33DRAFT_655732	33.2746	35.8379	29.6393	16.0221	9.56526	10.6137	157.905	168.105	142.169	61.8422	36.8008	40.9726	1.76794	1.86518e-09	6.83272e-09	proteasome endopeptidase complex, beta subunit
BCR33DRAFT_716074	26.6942	27.5752	22.1095	11.6276	10.9085	9.62824	174.554	178.232	146.132	61.8422	57.8299	51.2157	1.55202	2.9484e-09	1.06314e-08	hypothetical protein
BCR33DRAFT_763994	38.957	44.5014	32.2861	16.3093	13.0402	8.1029	161.437	182.283	135.234	54.9709	43.8105	27.315	1.94548	4.57998e-09	1.6317e-08	N-terminal nucleophile aminohydrolase
BCR33DRAFT_677710	34.7976	35.5537	28.8844	15.7491	6.1993	5.11609	242.66	245.069	203.594	89.3277	35.0484	29.0222	2.19946	1.62443e-07	5.11047e-07	PCI-domain-containing protein
BCR33DRAFT_714790	16.5804	18.6267	13.2797	2.95377	5.29023	6.23695	94.8441	105.319	76.7811	13.7427	24.5339	29.0222	2.01102	1.93909e-07	6.0727e-07	proteasome-domain-containing protein
BCR33DRAFT_711996	31.5431	33.6351	27.1842	0	7.20229	6.17006	160.932	169.624	140.188	0	29.7911	25.6079	3.04363	3.99499e-07	1.22105e-06	proteasome component PRE2
BCR33DRAFT_460856	10.4312	9.47293	10.4901	2.46028	0.944225	3.97259	71.6376	64.3052	72.8183	13.7427	5.25726	22.1935	2.33678	1.08937e-06	3.20476e-06	N-terminal nucleophile aminohydrolase
BCR33DRAFT_682849	17.3045	18.127	13.0866	0.611351	4.69258	5.46726	79.7094	82.5335	60.9296	2.29045	17.5242	20.4863	2.41052	2.88726e-06	8.19213e-06	proteasome subunit alpha type-4
BCR33DRAFT_852438	4.6236	7.88482	5.0674	0.330882	1.77784	1.47952	39.3502	66.3306	43.5919	2.29045	12.2669	10.2431	2.53194	1.7907e-05	4.74093e-05	hypothetical protein
BCR33DRAFT_716739	1.34784	1.09487	1.44029	0	0	0	10.0898	8.10145	10.898	0	0	0	4.79473	0.000899191	0.00197244	PCI-domain-containing protein
BCR33DRAFT_695865	7.87936	8.15305	7.07115	0.418879	0.964564	5.30683	52.9714	54.1784	48.0501	2.29045	5.25726	29.0222	2.04371	0.00434868	0.00868014	PCI-domain-containing protein
BCR33DRAFT_681864	9.47739	8.40516	9.32328	6.69652	0.514008	1.99621	39.8547	34.9375	39.629	22.9045	1.75242	6.82876	1.93287	0.00499076	0.00988344	N-terminal nucleophile aminohydrolase
BCR33DRAFT_130962	0.866747	0.880091	0.673596	0	0	0	5.0449	5.06341	3.9629	0	0	0	3.74671	0.0256485	0.0447517	26S proteasome non-ATPase regulatory subunit 7
BCR33DRAFT_696709	0.986895	1.00209	0.958712	0	0	0	4.54041	4.55706	4.45826	0	0	0	3.693	0.0287344	0.0495502	N-terminal nucleophile aminohydrolase

## Sheet: Endocytosis TvG (UP) (Fig 3F)
	fpkm						normalised read counts
Locus tag	IMA_1_fpkm	IMA_2_fpkm	IMA_3_fpkm	GER_1_fpkm	GER_2_fpkm	GER_3_fpkm	IMA_1	IMA_2	IMA_3	GER_1	GER_2	GER_3	log2FoldChange	pvalue	padj	Annotation
BCR33DRAFT_677362	142.963	142.326	150.845	10.8241	10.3644	9.15298	2838.54	2906.09	3036.21	240.794	231.951	207.735	3.69005	6.12144e-236	1.18722e-233	AAA-domain-containing protein
BCR33DRAFT_715996	316.19	300.283	291.885	38.5929	35.5518	33.526	4917.43	4802.58	4601.85	672.477	623.209	596.003	2.92048	6.6152e-207	9.72365e-205	actin-related protein 2/3 complex, subunit 1
BCR33DRAFT_676932	180.715	172.854	159.012	19.3029	18.4891	17.2333	2575	2532.88	2296.9	308.166	296.948	280.69	3.06339	1.29246e-163	1.06164e-161	ras-related protein rab-8A
BCR33DRAFT_501477	394.473	365.862	370.546	74.1926	68.0191	66.0747	5121.31	4884.67	4876.81	1079.21	995.35	980.56	2.28435	1.85003e-146	1.19601e-144	ras-related protein rab-8A
BCR33DRAFT_720009	176.242	166.534	174.524	31.1437	30.9327	27.3478	1443.06	1402.27	1448.64	285.709	285.478	255.96	2.37647	1.6435e-100	5.15725e-99	hypothetical protein
BCR33DRAFT_766443	116.539	96.1179	111.714	11.9967	13.9071	12.0426	1298.07	1101	1261.43	149.716	174.601	153.328	2.93889	1.0036e-96	2.9566e-95	Snf7-domain-containing protein
BCR33DRAFT_721664	48.0402	38.6728	42.6102	1.1642	0.413744	0.565479	918.997	760.796	826.329	24.9527	8.9212	12.3652	5.75761	1.65907e-92	4.58757e-91	BAR-domain-containing protein
BCR33DRAFT_720851	260.072	239.188	236.627	65.0077	66.2413	62.3716	2525.92	2389.02	2329.81	707.41	725.166	692.451	1.76954	1.08026e-79	2.34599e-78	F-actin capping protein, beta subunit
BCR33DRAFT_733331	141.034	142.671	146.022	31.7554	28.2137	37.0416	1305.62	1358.26	1370.39	329.376	294.399	391.977	1.9892	8.64926e-53	1.02528e-51	subunits of heterodimeric actin filament capping protein Capz
BCR33DRAFT_717226	24.8393	20.7061	23.6649	3.30779	4.69232	3.8749	568.615	487.451	549.18	84.8393	121.073	101.395	2.38636	3.12719e-42	2.85039e-41	Sec1 family protein
BCR33DRAFT_717168	123.62	113.935	109.405	23.87	30.7118	23.5059	841.973	798.032	755.397	182.155	235.774	183.005	1.99568	3.18462e-42	2.90085e-41	ARP23 complex 20 kDa subunit
BCR33DRAFT_721461	163.119	138.061	151.597	44.2244	33.1033	30.8442	1281.46	1115.38	1207.32	389.263	293.125	276.98	1.90962	2.79791e-36	2.17055e-35	ARP2/3 complex, 21 kDa p21-Arc subunit
BCR33DRAFT_719243	33.4386	28.5136	29.1439	2.6815	1.21012	2.17077	249.949	219.184	220.842	22.4575	10.1957	18.5478	3.74924	5.97718e-36	4.58853e-35	P-loop containing nucleoside triphosphate hydrolase protein
BCR33DRAFT_35191	130.69	119.335	120.56	38.1804	35.7473	41.5858	880.485	826.805	823.404	288.204	271.459	320.259	1.52377	4.96299e-35	3.70605e-34	Arf GTPase activating protein
BCR33DRAFT_854124	10.6837	10.6824	13.3971	0.162418	0.219891	0.210373	219.744	225.954	279.343	3.74291	5.09783	4.94608	5.71801	1.27589e-32	8.8905e-32	AAA-domain-containing protein
BCR33DRAFT_712281	60.2201	57.2845	56.8007	14.4584	10.1346	8.06486	718.887	703.25	687.389	193.384	136.367	110.05	2.26208	1.58954e-32	1.1021e-31	putative spindle pole body protein
BCR33DRAFT_79796	29.9459	22.3912	22.8292	3.33076	3.38203	2.92251	310.36	238.648	239.855	38.6768	39.5081	34.6226	2.80683	5.78167e-31	3.80647e-30	putative ADP ribosylation factor 1
BCR33DRAFT_696710	89.0467	83.5864	83.9027	29.5451	23.4848	25.0774	664.517	641.472	634.738	247.032	197.541	213.918	1.55905	3.4318e-30	2.20837e-29	hypothetical protein
BCR33DRAFT_713492	27.5996	20.3439	21.5394	0.107956	0.219236	0.104873	284.685	215.799	225.23	1.24764	2.54891	1.23652	7.17845	1.40962e-21	6.61201e-21	GTP-binding protein rho1
BCR33DRAFT_160417	168.478	147.907	150.621	75.258	75.3797	67.4545	1837.24	1658.69	1665.09	919.509	926.53	840.833	0.941933	3.42398e-20	1.52317e-19	hypothetical protein
BCR33DRAFT_768524	8.01156	8.50466	7.23207	1.87344	1.82464	2.26564	233.336	254.727	213.529	61.1342	59.8994	75.4277	1.83474	1.06948e-18	4.46064e-18	FYVE-domain-containing protein
BCR33DRAFT_791403	4.3912	3.73857	3.0674	0.0404714	0.123284	0.0393157	120.821	105.784	85.558	1.24764	3.82337	1.23652	5.63793	1.53374e-15	5.54703e-15	Sec1-like protein
BCR33DRAFT_755965	42.3812	32.7983	41.854	13.2843	12.1093	13.1983	312.625	248.803	312.981	109.792	100.682	111.287	1.44321	9.37496e-15	3.25166e-14	vacuolar protein sorting-associated
BCR33DRAFT_695530	32.524	22.6311	22.9867	8.10153	6.08742	6.92575	223.519	159.945	160.147	62.3819	47.1549	54.4069	1.72937	7.3485e-12	2.21917e-11	hypothetical protein
BCR33DRAFT_680162	28.1079	23.5777	29.1059	14.9141	15.4418	14.9772	1492.14	1287.18	1566.37	887.07	923.981	908.842	0.676515	2.3345e-09	6.07511e-09	Sec7-domain-containing protein
BCR33DRAFT_845892	62.9248	59.1693	59.4148	35.8154	38.7622	35.0704	980.163	947.821	938.213	625.066	680.56	624.443	0.570677	2.79024e-08	6.78796e-08	vacuolar protein sorting-associated protein 26
BCR33DRAFT_656438	2.47444	2.87052	1.90623	0.17656	0.418315	0.171517	46.8182	55.8538	36.5632	3.74291	8.9212	3.70956	3.09148	3.4574e-08	8.37016e-08	SAICAR synthase-like protein
BCR33DRAFT_753822	236.807	225.461	226.747	148.753	157.062	133.657	1912.75	1872.79	1856.68	1346.2	1429.94	1234.05	0.492738	3.44721e-07	7.82331e-07	ras-domain-containing protein
BCR33DRAFT_475537	1.12897	0.698282	0.641245	0	0	0	27.9399	17.7717	16.0878	0	0	0	6.48268	1.14367e-06	2.50043e-06	BRO1-domain-containing protein
BCR33DRAFT_654670	4.80933	5.83999	4.72541	0	0.205748	0	26.4297	33.0045	26.3255	0	1.27446	0	5.9916	2.64724e-06	5.63507e-06	Arf GTPase activating protein
BCR33DRAFT_457792	7.46288	7.17327	6.72847	3.70956	1.63222	2.16217	134.414	132.864	122.853	74.8582	33.1359	44.5147	1.35383	6.21834e-06	1.28717e-05	hypothetical protein
BCR33DRAFT_717309	87.4768	88.7433	87.1591	60.3347	59.7802	55.3476	666.782	695.633	673.495	515.274	513.606	482.243	0.429936	7.42345e-05	0.000140767	hypothetical protein
BCR33DRAFT_249393	65.1808	62.6529	67.0792	41.4453	43.4904	43.8107	576.166	569.539	601.1	410.473	433.315	442.674	0.441565	0.000112769	0.000210635	clathrin coat assembly protein ap17
BCR33DRAFT_758496	50.8844	44.8994	42.5318	27.8585	27.5766	29.2388	404.751	367.281	342.963	248.28	247.245	265.852	0.550137	0.00012561	0.000233527	hypothetical protein
BCR33DRAFT_714128	0.538687	0.548755	0.592892	0.207226	0.122743	0.0503271	34.7361	36.3896	38.757	14.9716	8.9212	3.70956	1.9945	0.000129495	0.000240397	Sec7-domain-containing protein
BCR33DRAFT_715962	15.5543	14.615	14.5418	10.3282	9.49469	7.27962	531.614	513.685	503.842	395.501	365.769	284.4	0.567298	0.000186876	0.000342279	vacuolar protein sorting-associated protein 35
BCR33DRAFT_672584	4.34846	1.57959	7.61549	0	0.542593	0	18.1232	6.77015	32.1757	0	2.54891	0	4.50822	0.000449766	0.000795107	Arf GTPase activating protein
BCR33DRAFT_697928	43.9281	42.7445	44.3945	32.8245	29.8535	32.2955	1628.82	1629.91	1668.75	1363.67	1247.69	1368.83	0.307956	0.000713394	0.00123581	vacuolar protein sorting-associated protein 35
BCR33DRAFT_302348	0.726661	0.416783	0.949889	0	0.229065	0	14.3475	8.46269	19.0129	0	5.09783	0	3.05471	0.00513259	0.00814171	HECT-domain-containing protein

## Sheet: Phagosome TvG (UP) (Fig 3F)
	fpkm						normalised read counts
Locus tag	IMA_1_fpkm	IMA_2_fpkm	IMA_3_fpkm	GER_1_fpkm	GER_2_fpkm	GER_3_fpkm	IMA_1	IMA_2	IMA_3	GER_1	GER_2	GER_3	log2FoldChange	pvalue	padj	Annotation
BCR33DRAFT_756938	5283.38	4724.24	5033.11	459.683	449.207	410.635	88143.7	81052.3	85122.9	8592.48	8447.1	7830.88	3.35415	0	0	Gtp-tubulin in complex with A Darpin
BCR33DRAFT_711451	6869.88	6191.49	6429.32	288.84	251.468	243.999	97888.6	90726	92870.7	4611.27	4038.75	3974.17	4.47879	0	0	tubulin beta-2C chain
BCR33DRAFT_758768	660.101	592.74	615.487	75.2973	72.763	84.4548	4041.47	3732.05	3820.13	516.522	502.136	591.056	2.84823	4.85475e-162	3.87381e-160	V-type ATPase
BCR33DRAFT_757555	207.344	195.828	194.585	23.5152	29.0967	27.3206	3907.81	3795.52	3717.75	496.56	618.111	588.583	2.7455	4.34689e-138	2.47755e-136	V-type ATPase
BCR33DRAFT_719251	128.353	106.181	117.545	13.0989	13.9191	11.2452	1407.57	1197.47	1306.77	160.945	172.052	140.963	3.04587	1.63888e-104	5.48807e-103	tubulin alpha-1C chain-like protein
BCR33DRAFT_714628	119.537	107.747	113.523	27.8326	24.91	26.1828	3629.92	3364.77	3494.72	946.957	852.611	908.842	1.95338	7.44942e-98	2.22749e-96	V0/A0 complex, 116-kDa subunit of ATPase
BCR33DRAFT_712198	377.991	340.835	330.451	78.9815	87.5549	85.3488	2323.54	2154.6	2059.24	543.97	606.641	599.712	1.90115	1.76519e-71	3.16826e-70	hypothetical protein
BCR33DRAFT_720617	5.05433	3.16582	3.74073	0.0766228	0.0707294	0.0879682	807.992	520.456	606.219	13.724	12.7446	16.0748	5.5062	5.88546e-68	9.83069e-67	hypothetical protein
BCR33DRAFT_681588	56.0067	55.7706	58.1613	11.5827	9.49645	8.87572	866.893	887.736	912.619	200.87	165.679	157.038	2.34885	8.27248e-65	1.29214e-63	ATPase, V1 complex, subunit C
BCR33DRAFT_721456	299.997	265.034	264.464	55.4439	66.4412	65.8296	2006.39	1822.86	1793.06	415.463	500.861	503.264	1.98581	1.35743e-61	1.96631e-60	V-type ATPase
BCR33DRAFT_758052	137.941	123.522	133.048	38.8692	34.7278	29.126	1711.13	1575.75	1673.13	540.227	485.568	412.998	1.78577	5.40767e-46	5.51187e-45	ATPase, V0 complex, subunit D
BCR33DRAFT_256	62.7358	56.555	56.3207	3.63269	3.1968	3.29369	288.461	267.421	262.524	18.7146	16.5679	17.3113	3.95952	1.26541e-45	1.2749e-44	hypothetical protein
BCR33DRAFT_711354	75.9077	70.1752	60.245	15.4845	12.5973	12.6863	906.16	861.502	729.071	207.108	169.503	173.113	2.18283	1.82449e-45	1.83157e-44	ATPase, V1/A+Q15:Q301 complex, subunit D
BCR33DRAFT_357150	60.225	63.5027	54.8225	7.15311	2.82983	3.88052	721.907	782.799	666.182	96.0681	38.2337	53.1703	3.53215	9.0268e-45	8.92707e-44	tubulin nucleotide-binding domain-like protein
BCR33DRAFT_853838	2.56485	1.66948	2.11015	0.044798	0.103972	0.149207	446.284	298.733	372.214	8.73346	20.3913	29.6765	4.24738	2.40393e-40	2.10066e-39	hypothetical protein
BCR33DRAFT_851265	4.07026	2.58861	2.91918	0.227211	0.346063	0.36787	718.131	469.679	522.123	44.9149	68.8206	74.1912	3.18615	3.83329e-40	3.32886e-39	hypothetical protein
BCR33DRAFT_719243	33.4386	28.5136	29.1439	2.6815	1.21012	2.17077	249.949	219.184	220.842	22.4575	10.1957	18.5478	3.74924	5.97718e-36	4.58853e-35	P-loop containing nucleoside triphosphate hydrolase protein
BCR33DRAFT_792570	126.642	108.984	115.047	41.8722	45.1524	43.6625	2064.53	1827.1	1901.29	764.802	829.671	813.63	1.26661	1.48418e-35	1.1282e-34	ARM repeat-containing protein
BCR33DRAFT_715081	13.9771	14.4412	17.0478	0.213957	0.434501	0.0692823	218.233	231.878	269.837	3.74291	7.64674	1.23652	5.84419	1.55028e-31	1.04177e-30	tubulin nucleotide-binding domain-like protein
BCR33DRAFT_714104	2.9644	1.78253	1.66348	0.12617	0.195936	0.237924	444.773	275.037	253.018	21.2098	33.1359	40.8051	3.3538	7.35025e-27	4.23952e-26	hypothetical protein
BCR33DRAFT_851689	137.039	131.697	140.766	64.4944	61.6385	70.5666	2697.34	2665.75	2808.79	1422.31	1367.49	1587.69	0.900512	1.76296e-20	7.94385e-20	SecY protein
BCR33DRAFT_655262	154.92	126.619	141.632	49.5647	59.2692	47.1716	685.661	576.309	635.469	245.785	295.674	238.648	1.28326	1.91445e-18	7.90226e-18	vacuolar ATP synthase
BCR33DRAFT_757835	31.9877	32.0152	33.3709	4.13774	7.39453	9.84796	860.852	886.044	910.425	124.764	224.304	302.947	2.02684	3.16922e-16	1.18965e-15	V-type ATPase
BCR33DRAFT_716941	10.4015	10.9573	11.0571	4.24755	3.63405	3.62957	294.502	319.043	317.369	134.745	115.976	117.469	1.33784	5.01222e-16	1.86046e-15	phosphatidylinositol 3-kinase
BCR33DRAFT_757273	1.85363	1.31142	1.21909	0.236133	0.399615	0.271097	288.461	209.875	192.323	41.172	70.0951	48.2243	2.11607	5.23597e-15	1.83984e-14	hypothetical protein
BCR33DRAFT_712279	175.672	138.967	162.742	70.4473	77.9659	66.2629	1049.63	853.886	985.745	471.607	525.076	452.566	0.996097	2.80462e-14	9.5498e-14	hypothetical protein
BCR33DRAFT_720231	3.41967	1.82333	1.90205	0.382356	0.578701	0.574676	527.838	289.424	297.625	66.1248	100.682	101.395	2.05605	3.20167e-13	1.03419e-12	hypothetical protein
BCR33DRAFT_717660	2.58303	2.12753	2.46746	0.420764	0.831998	0.408748	129.883	110.015	125.778	23.7051	47.1549	23.4939	1.9579	5.2882e-10	1.43554e-09	hypothetical protein
BCR33DRAFT_753822	236.807	225.461	226.747	148.753	157.062	133.657	1912.75	1872.79	1856.68	1346.2	1429.94	1234.05	0.492738	3.44721e-07	7.82331e-07	ras-domain-containing protein
BCR33DRAFT_755205	95.3809	89.6951	101.089	64.6272	59.7124	56.7744	875.954	847.115	941.138	664.991	618.111	596.003	0.504046	4.97589e-06	1.03753e-05	snare-like protein
BCR33DRAFT_761902	1.47903	0.879157	0.97996	0.492016	0.380286	0.435163	224.274	137.096	150.641	83.5917	64.9973	75.4277	1.19312	5.66024e-06	1.17478e-05	hypothetical protein
BCR33DRAFT_457792	7.46288	7.17327	6.72847	3.70956	1.63222	2.16217	134.414	132.864	122.853	74.8582	33.1359	44.5147	1.35383	6.21834e-06	1.28717e-05	hypothetical protein
BCR33DRAFT_712026	0.754172	0.419208	0.420653	0.134351	0.136419	0.188521	112.515	64.3165	63.62	22.4575	22.9402	32.1495	1.63266	1.39818e-05	2.80882e-05	hypothetical protein
BCR33DRAFT_758496	50.8844	44.8994	42.5318	27.8585	27.5766	29.2388	404.751	367.281	342.963	248.28	247.245	265.852	0.550137	0.00012561	0.000233527	hypothetical protein
BCR33DRAFT_696408	32.1015	5.45527	3.11207	0.703041	0.713864	1.13827	305.074	53.315	29.9819	7.48582	7.64674	12.3652	3.81971	0.000244394	0.000442866	ATPase, V1/A1 complex, subunit E

## Sheet: FA Degr. TvG (UP) (Fig 3F)
	fpkm						normalised read counts
Locus tag	IMA_1_fpkm	IMA_2_fpkm	IMA_3_fpkm	GER_1_fpkm	GER_2_fpkm	GER_3_fpkm	IMA_1	IMA_2	IMA_3	GER_1	GER_2	GER_3	log2FoldChange	pvalue	padj	Annotation
BCR33DRAFT_761305	296.999	277.994	286.5	5.66094	4.85754	5.18946	4147.95	3992.7	4056.33	88.5823	76.4674	82.8468	5.62011	0	0	hypothetical protein
BCR33DRAFT_703686	93.9039	92.95	89.3725	3.77927	2.9751	3.7951	2462.49	2506.65	2375.88	111.04	87.9375	113.76	4.55243	1.65713e-244	3.67305e-242	acetyl-CoA synthetase-like protein
BCR33DRAFT_782173	97.7914	93.6718	107.115	6.83666	6.94191	5.7339	2564.43	2526.11	2847.55	200.87	205.187	171.876	3.78046	4.68679e-199	6.00425e-197	acetyl-CoA synthetase-like protein
BCR33DRAFT_758705	113.484	102.953	107.336	2.30032	1.31385	1.39664	1757.95	1640.07	1685.57	39.9244	22.9402	24.7304	5.85768	4.92675e-177	4.87922e-175	thiolase
BCR33DRAFT_714229	78.0263	69.6115	71.0165	3.4156	5.22316	4.35745	2111.35	1937.11	1948.09	103.554	159.307	134.781	3.91553	6.17816e-148	4.10818e-146	acetyl-CoA synthetase-like protein
BCR33DRAFT_574092	76.3807	71.5187	84.031	0.702132	1.06941	0.966282	1453.63	1399.73	1621.21	14.9716	22.9402	21.0208	6.24797	1.33259e-145	8.45833e-144	acetyl-CoA synthetase-like protein
BCR33DRAFT_721418	57.4318	48.5854	46.807	4.62878	5.37717	4.80145	1630.33	1418.35	1346.99	147.221	172.052	155.801	3.2103	1.60866e-112	6.38164e-111	acyl-CoA oxidase
BCR33DRAFT_693216	64.8269	59.6105	54.6609	5.02108	6.62127	6.08128	1107.02	1046.83	946.257	96.0681	127.446	118.706	3.17971	3.90225e-93	1.09201e-91	aldehyde dehydrogenase
BCR33DRAFT_711512	28.6507	22.8029	24.6627	1.04437	1.73527	1.15289	672.068	550.075	586.475	27.448	45.8804	30.913	4.11972	1.47056e-75	2.91275e-74	acyl-CoA oxidase
BCR33DRAFT_715994	248.805	282.887	276.45	80.355	85.6002	84.7316	5123.58	5990.74	5771.14	1853.99	1986.88	1994.51	1.53283	3.02349e-54	3.7364e-53	Methylmalonate-semialdehyde dehydrogenase
BCR33DRAFT_725464	19.768	18.9976	20.9068	0.240252	0.487902	0.311188	274.868	271.652	294.7	3.74291	7.64674	4.94608	5.69082	8.30468e-39	6.94826e-38	NAD(P)-binding protein
BCR33DRAFT_782175	8.74906	8.52906	8.7556	0.921549	0.757501	1.23627	222.009	222.569	225.23	26.2004	21.6658	35.8591	2.99772	5.08263e-32	3.45708e-31	acetyl-CoA synthetase-like protein
BCR33DRAFT_763286	13.1986	9.9002	9.14221	1.43235	1.58273	1.02312	348.871	269.114	244.974	42.4197	47.1549	30.913	2.84195	5.27403e-29	3.27318e-28	acyl-CoA oxidase
BCR33DRAFT_720060	9.37619	7.2737	8.04584	0.292934	0.475909	0.62605	178.211	142.173	155.028	6.23819	10.1957	13.6017	3.98403	1.43021e-26	8.18502e-26	acyl-CoA dehydrogenase NM domain-like protein
BCR33DRAFT_753213	77.3368	82.9446	76.9414	40.3386	39.1897	39.368	1383.4	1525.82	1395.25	808.469	790.163	804.974	0.840272	1.31399e-17	5.23943e-17	aldehyde dehydrogenase-like protein 8 family, member A1
BCR33DRAFT_753352	10.9996	15.6132	10.2867	0.0681528	0	0	179.722	262.343	170.385	1.24764	0	0	8.82786	2.52599e-13	8.19921e-13	aldehyde dehydrogenase family 3 member B1-like protein
BCR33DRAFT_713792	3.11592	2.93045	3.99586	0.188829	0.255648	0.366873	55.1247	53.315	71.664	3.74291	5.09783	7.41912	3.46912	3.39103e-11	9.8733e-11	betaine aldehyde dehydrogenase
BCR33DRAFT_773779	3.49406	5.27733	5.38722	0.271183	0.183572	0	43.0426	66.8553	67.2764	3.74291	2.54891	0	4.82052	1.394e-10	3.92615e-10	alcohol dehydrogenase
BCR33DRAFT_857613	1.84987	2.28926	2.69558	0.138706	0.140841	0.26949	44.5528	56.7	65.8139	3.74291	3.82337	7.41912	3.47569	2.4706e-10	6.85738e-10	acetyl-CoA synthetase-like protein
BCR33DRAFT_791301	1.66717	1.49808	1.22936	0.043131	0.08759	0.0837985	43.0426	39.7747	32.1757	1.24764	2.54891	2.47304	4.19755	4.0854e-08	9.84785e-08	acyl-CoA synthetase-like protein long-chain family member 1
BCR33DRAFT_752974	1.29806	1.67178	1.12726	0.0435039	0.0441736	0.0422615	33.2259	44.006	29.2506	1.24764	1.27446	1.23652	4.82216	3.16851e-07	7.20839e-07	acetyl-CoA synthetase-like protein
BCR33DRAFT_758041	11.5069	12.9211	9.43239	4.12747	5.99548	5.012	223.519	258.112	185.741	89.8299	131.269	111.287	1.00489	4.83608e-06	1.00973e-05	aldehyde dehydrogenase
BCR33DRAFT_720251	19.2878	17.2064	20.0531	10.3628	12.2238	10.3667	487.061	446.83	513.348	293.195	347.927	299.238	0.623013	7.30034e-06	1.5029e-05	acyl-CoA synthetase
BCR33DRAFT_757306	4.94064	5.55641	4.56856	1.92341	2.0122	2.43469	94.3916	109.169	88.4831	41.172	43.3315	53.1704	1.08279	4.73983e-05	9.12798e-05	aldehyde dehydrogenase
BCR33DRAFT_713542	7.82892	7.73398	7.17463	3.33204	3.09742	5.65315	185.763	188.718	172.579	88.5823	82.8397	153.328	0.751126	0.00311793	0.005065	aldehyde dehydrogenase
BCR33DRAFT_754181	355.081	363.582	367.525	281.842	282.865	278.901	4963.49	5226.56	5208.07	4414.14	4456.77	4456.42	0.208336	0.00502416	0.00798059	alcohol dehydrogenase

## Sheet: Peroxisome TvG (UP) (Fig 3F)
	fpkm						normalised read counts
Locus tag	IMA_1_fpkm	IMA_2_fpkm	IMA_3_fpkm	GER_1_fpkm	GER_2_fpkm	GER_3_fpkm	IMA_1	IMA_2	IMA_3	GER_1	GER_2	GER_3	log2FoldChange	pvalue	padj	Annotation
BCR33DRAFT_703686	93.9039	92.95	89.3725	3.77927	2.9751	3.7951	2462.49	2506.65	2375.88	111.04	87.9375	113.76	4.55243	1.65713e-244	3.67305e-242	alcohol dehydrogenase
BCR33DRAFT_782173	97.7914	93.6718	107.115	6.83666	6.94191	5.7339	2564.43	2526.11	2847.55	200.87	205.187	171.876	3.78046	4.68679e-199	6.00425e-197	acetyl-CoA synthetase-like protein
BCR33DRAFT_758705	113.484	102.953	107.336	2.30032	1.31385	1.39664	1757.95	1640.07	1685.57	39.9244	22.9402	24.7304	5.85768	4.92675e-177	4.87922e-175	thiolase
BCR33DRAFT_717375	496.306	539.693	561.581	69.5522	61.6455	55.4143	8438.61	9436.75	9679.75	1324.99	1181.42	1077.01	2.94294	1.34467e-151	9.43569e-150	isocitrate dehydrogenase [NADP]
BCR33DRAFT_714229	78.0263	69.6115	71.0165	3.4156	5.22316	4.35745	2111.35	1937.11	1948.09	103.554	159.307	134.781	3.91553	6.17816e-148	4.10818e-146	acetyl-CoA synthetase-like protein
BCR33DRAFT_574092	76.3807	71.5187	84.031	0.702132	1.06941	0.966282	1453.63	1399.73	1621.21	14.9716	22.9402	21.0208	6.24797	1.33259e-145	8.45833e-144	acetyl-CoA synthetase-like protein
BCR33DRAFT_845275	49.4422	41.6732	46.8098	1.14778	0.658735	0.533264	1103.25	956.284	1058.87	28.6957	16.5679	13.6017	5.7273	4.34195e-116	1.80449e-114	acyltransferase ChoActase/COT/CPT
BCR33DRAFT_721418	57.4318	48.5854	46.807	4.62878	5.37717	4.80145	1630.33	1418.35	1346.99	147.221	172.052	155.801	3.2103	1.60866e-112	6.38164e-111	acyl-CoA oxidase
BCR33DRAFT_713646	301.011	284.072	272.064	52.0325	56.7471	48.1753	2608.98	2532.04	2390.51	505.293	554.389	477.297	2.2931	1.19359e-104	4.04546e-103	superoxide dismutase [Mn], mitochondrial
BCR33DRAFT_683445	41.2612	32.1178	30.5202	1.38571	1.27913	1.59089	1094.19	875.889	820.479	41.172	38.2337	48.2243	4.44956	9.92817e-99	3.0008e-97	hypothetical protein
BCR33DRAFT_711512	28.6507	22.8029	24.6627	1.04437	1.73527	1.15289	672.068	550.075	586.475	27.448	45.8804	30.913	4.11972	1.47056e-75	2.91275e-74	acyl-CoA oxidase
BCR33DRAFT_720201	16.7404	16.5276	17.1482	1.24993	1.67712	1.73462	417.589	423.981	433.64	34.9338	47.1549	49.4608	3.27725	1.75104e-59	2.45006e-58	acyltransferase ChoActase/COT/CPT
BCR33DRAFT_753456	12.6744	10.6568	9.34154	0.871333	1.15017	0.84645	323.952	280.115	242.049	24.9527	33.1359	24.7304	3.35426	9.9487e-38	8.08166e-37	hypothetical protein
BCR33DRAFT_782175	8.74906	8.52906	8.7556	0.921549	0.757501	1.23627	222.009	222.569	225.23	26.2004	21.6658	35.8591	2.99772	5.08263e-32	3.45708e-31	acetyl-CoA synthetase-like protein
BCR33DRAFT_718396	18.3941	15.7953	14.0321	1.24601	0.8759	0.931095	213.703	188.718	165.266	16.2193	11.4701	12.3652	3.824	1.03732e-30	6.77189e-30	NAD(P)-binding protein
BCR33DRAFT_763286	13.1986	9.9002	9.14221	1.43235	1.58273	1.02312	348.871	269.114	244.974	42.4197	47.1549	30.913	2.84195	5.27403e-29	3.27318e-28	acyl-CoA oxidase
BCR33DRAFT_720060	9.37619	7.2737	8.04584	0.292934	0.475909	0.62605	178.211	142.173	155.028	6.23819	10.1957	13.6017	3.98403	1.43021e-26	8.18502e-26	acyl-CoA dehydrogenase NM domain-like protein
BCR33DRAFT_712292	18.5519	17.7583	20.1168	6.16157	7.25746	7.06302	335.279	330.045	368.558	124.764	147.837	145.909	1.3054	6.45245e-16	2.37924e-15	hypothetical protein
BCR33DRAFT_769757	5.63868	5.52828	6.39522	1.00114	1.89191	1.02658	225.785	227.646	259.599	44.9149	85.3886	46.9878	2.01018	6.62268e-15	2.31777e-14	AAA-domain-containing protein
BCR33DRAFT_654674	16.6631	14.4131	13.919	4.62792	5.37048	4.38872	168.395	149.79	142.597	52.4008	61.1739	50.6973	1.48879	8.40705e-11	2.39682e-10	TPR-like protein
BCR33DRAFT_857613	1.84987	2.28926	2.69558	0.138706	0.140841	0.26949	44.5528	56.7	65.8139	3.74291	3.82337	7.41912	3.47569	2.4706e-10	6.85738e-10	acetyl-CoA synthetase-like protein
BCR33DRAFT_791301	1.66717	1.49808	1.22936	0.043131	0.08759	0.0837985	43.0426	39.7747	32.1757	1.24764	2.54891	2.47304	4.19755	4.0854e-08	9.84785e-08	acyl-CoA synthetase-like protein long-chain family member 1
BCR33DRAFT_661256	4.28525	6.43409	5.0032	0	0.142588	0	33.981	52.4687	40.2196	0	1.27446	0	6.55388	1.73562e-07	4.02328e-07	NAD(P)-binding protein
BCR33DRAFT_752974	1.29806	1.67178	1.12726	0.0435039	0.0441736	0.0422615	33.2259	44.006	29.2506	1.24764	1.27446	1.23652	4.82216	3.16851e-07	7.20839e-07	acetyl-CoA synthetase-like protein
BCR33DRAFT_720251	19.2878	17.2064	20.0531	10.3628	12.2238	10.3667	487.061	446.83	513.348	293.195	347.927	299.238	0.623013	7.30034e-06	1.5029e-05	acyl-CoA synthetase

## Sheet: ER Prot Proc TvG (UP) (Fig 3F)
	fpkm						normalised read counts
Locus tag	IMA_1_fpkm	IMA_2_fpkm	IMA_3_fpkm	GER_1_fpkm	GER_2_fpkm	GER_3_fpkm	IMA_1	IMA_2	IMA_3	GER_1	GER_2	GER_3	log2FoldChange	pvalue	padj	Annotation
BCR33DRAFT_663752	454.109	399.888	436.154	11.9579	13.7351	14.294	11925.1	10799.2	11611	351.834	406.552	429.072	4.85375	0	0	endoplasmin-like protein
BCR33DRAFT_713589	648.228	576.358	600.668	27.5893	26.9392	27.0585	10910.2	9975.82	10248.7	520.265	511.057	520.575	4.3264	0	0	thioredoxin-domain-containing protein
BCR33DRAFT_717939	2794.59	2666.81	2742.97	376.256	419.781	401.284	55521.2	54486.2	55244.9	8375.39	9400.39	9113.15	2.6196	4.29299e-232	8.10098e-230	protein disulfide isomerase A
BCR33DRAFT_853069	83.2609	73.9858	76.4847	9.41981	9.72833	7.97762	2303.16	2104.67	2144.8	291.947	303.321	252.25	2.95129	8.29169e-140	4.80436e-138	PFU-domain-containing protein
BCR33DRAFT_757946	319.191	295.279	325.731	80.8285	82.7173	82.9681	7840.55	7459.02	8111.19	2224.54	2290.2	2329.6	1.77425	1.20148e-105	4.12223e-104	molecular chaperone bip1
BCR33DRAFT_846359	296.115	272.624	270.86	74.1684	65.2623	67.9171	10229.8	9685.55	9485.97	2870.81	2541.27	2682.01	1.8609	2.6047e-98	7.82193e-97	AAA ATPase
BCR33DRAFT_722163	35.7766	31.1295	30.101	4.19364	4.48632	3.52827	1063.98	952.053	907.5	139.735	150.386	119.942	2.83452	1.41877e-80	3.13477e-79	Cullin-domain-containing protein
BCR33DRAFT_784433	70.6322	72.7676	72.2872	12.8475	12.9521	12.2132	857.076	908.047	889.218	174.669	177.149	169.403	2.34839	6.48926e-77	1.34047e-75	UFD1-domain-containing protein
BCR33DRAFT_791708	28.8301	26.512	25.7435	3.77396	4.06291	4.01955	706.049	667.706	639.126	103.554	112.152	112.523	2.61651	3.96463e-69	6.78458e-68	polyubiquitin-tagged protein recognition complex, Npl4 component
BCR33DRAFT_713924	108.454	103.909	100.472	16.3898	18.5691	16.5921	700.008	689.709	657.407	118.526	135.092	122.415	2.44501	1.57664e-65	2.50469e-64	ubiquitin-conjugating enzyme
BCR33DRAFT_790748	13.2262	14.69	13.7589	1.08922	1.34792	0.89278	432.691	494.221	456.309	39.9244	49.7038	33.386	3.4927	1.55425e-62	2.31629e-61	seven-hairpin glycosidase
BCR33DRAFT_693165	208.124	210.394	220.903	64.043	67.5625	69.0011	2786.44	2896.78	2998.19	960.681	1019.57	1055.99	1.51565	4.31993e-61	6.19974e-60	heat shock protein DnaJ family protein
BCR33DRAFT_707288	663.67	590.938	641.71	204.935	214.876	225.591	16033	14681.1	15715.6	5547	5851.03	6229.59	1.39723	2.53334e-57	3.37553e-56	molecular chaperone bip1
BCR33DRAFT_685703	60.6013	53.4729	61.7272	15.1595	17.3009	15.531	2118.9	1922.72	2187.94	593.875	681.834	620.733	1.71626	4.00244e-55	5.02608e-54	HSP70-domain-containing protein
BCR33DRAFT_720197	61.6234	51.4085	52.4698	11.4332	9.4231	9.01521	924.283	792.954	797.81	192.136	159.307	154.565	2.31344	5.35244e-54	6.57935e-53	SEP-domain-containing protein
BCR33DRAFT_786990	19.3156	17.321	17.2676	0.19863	0.121012	0.154366	541.43	499.299	490.679	6.23819	3.82337	4.94608	6.67086	1.18575e-51	1.36728e-50	hypothetical protein
BCR33DRAFT_379730	56.0731	55.1364	65.6348	14.4798	14.1997	11.6232	1638.64	1656.99	1944.43	474.102	467.725	388.267	1.97846	2.64424e-51	3.01669e-50	Cullin-domain-containing protein
BCR33DRAFT_562608	47.2724	41.3527	48.9461	3.63565	3.2101	3.53182	333.014	299.579	349.545	28.6957	25.4891	28.44	3.57132	3.92031e-50	4.35507e-49	ubiquitin-conjugating enzyme E2 G2-like protein
BCR33DRAFT_711631	79.018	69.1982	68.2789	12.8932	12.9281	15.0301	545.961	491.682	478.247	99.811	100.682	118.706	2.24721	2.82091e-43	2.66337e-42	ubiquitin-protein ligase
BCR33DRAFT_703585	27.052	29.9282	28.6693	2.18253	2.58549	2.00242	248.439	282.654	266.912	22.4575	26.7636	21.0208	3.50694	3.87615e-42	3.52157e-41	UBC-like protein
BCR33DRAFT_726299	63.9831	57.2266	64.3615	18.5605	19.895	21.6052	2207.25	2030.2	2250.83	717.391	773.595	851.962	1.46961	1.27927e-41	1.1525e-40	HSP70-domain-containing protein
BCR33DRAFT_852588	13.7547	13.9413	15.518	4.1771	4.39923	4.03894	788.359	821.727	901.65	268.242	284.204	264.615	1.62058	4.00062e-38	3.29779e-37	hypothetical protein
BCR33DRAFT_658410	273.423	257.69	293.057	118.741	114.497	105.511	3156.46	3059.26	3429.63	1535.84	1489.84	1392.32	1.12663	6.14826e-32	4.1758e-31	disulfide isomerase
BCR33DRAFT_724404	42.6562	41.6669	46.3872	11.5951	15.3094	11.3	1282.22	1288.02	1413.54	390.51	518.704	388.267	1.619	3.14094e-30	2.02307e-29	actin-like ATPase domain-containing protein
BCR33DRAFT_725083	44.4894	42.0909	42.6046	9.4655	6.62843	10.1464	303.563	295.348	294.7	72.363	50.9783	79.1373	2.14031	3.57572e-26	2.01499e-25	E3 ubiquitin ligase SCF complex, Skp subunit
BCR33DRAFT_722497	20.3471	15.8405	19.6465	6.00092	6.86045	5.95537	1049.63	840.345	1027.43	346.843	398.905	351.172	1.41201	4.92557e-24	2.53991e-23	hypothetical protein
BCR33DRAFT_711017	150.314	142.952	141.378	60.5351	60.3116	56.8167	735.5	719.329	701.283	331.872	332.633	317.786	1.13426	4.72072e-23	2.3376e-22	RING/U-box
BCR33DRAFT_853947	3.72322	3.5958	3.8335	0.0657532	0.200296	0.159689	126.107	125.248	131.628	2.49527	7.64674	6.1826	4.55541	1.27174e-22	6.18768e-22	HSP70-domain-containing protein
BCR33DRAFT_701974	38.4316	38.0422	37.9796	17.8451	17.8801	15.4349	1268.62	1291.41	1270.94	660	665.266	582.401	1.00603	4.48731e-22	2.14152e-21	HCP-like protein
BCR33DRAFT_185134	6.85732	5.6847	6.19959	1.11955	1.2468	0.666579	211.437	180.255	193.785	38.6768	43.3315	23.4939	2.47492	2.90959e-21	1.34758e-20	hypothetical protein
BCR33DRAFT_717915	2.02082	2.4879	2.11823	0.177188	0.343475	0.15648	139.7	176.87	148.447	13.724	26.7636	12.3652	3.14048	3.19829e-21	1.48031e-20	hypothetical protein
BCR33DRAFT_766080	44.1343	40.043	46.8225	7.09805	11.0648	12.6253	491.592	458.678	528.705	88.5823	138.916	160.748	1.92977	1.01186e-20	4.60399e-20	UBC-like protein
BCR33DRAFT_851689	137.039	131.697	140.766	64.4944	61.6385	70.5666	2697.34	2665.75	2808.79	1422.31	1367.49	1587.69	0.900512	1.76296e-20	7.94385e-20	SecY protein
BCR33DRAFT_783075	14.9084	13.7067	17.6386	4.97763	5.44536	5.38235	560.309	529.764	672.033	209.603	230.677	231.229	1.39256	6.70778e-20	2.95574e-19	kinase-like protein
BCR33DRAFT_757063	176.307	169.571	174.127	102.233	101.55	98.4426	5035.23	4980.29	5041.34	3271.31	3268.98	3213.72	0.626387	4.68634e-18	1.90454e-17	STT3 subunit of Oligosaccharyl transferase
BCR33DRAFT_721101	26.0184	20.0074	24.9721	10.3041	9.84728	9.20513	1434	1134	1395.25	636.295	611.739	579.928	1.11694	6.17649e-18	2.49923e-17	hypothetical protein
BCR33DRAFT_496484	75.8296	112.385	101.412	27.3962	25.1686	30.7779	453.08	690.556	614.263	183.403	169.503	210.208	1.6415	1.78192e-17	7.05895e-17	DnaJ-domain-containing protein
BCR33DRAFT_157923	28.7377	29.924	28.7263	9.3444	10.5702	11.6256	390.404	418.057	395.614	142.231	161.856	180.532	1.31247	2.22582e-17	8.75777e-17	DnaJ-domain-containing protein
BCR33DRAFT_718817	190.26	181.951	159.199	91.3952	90.2115	79.9332	2325.05	2286.62	1972.22	1251.38	1242.59	1116.58	0.866634	6.22699e-15	2.18203e-14	hypothetical protein
BCR33DRAFT_725154	18.9346	20.76	24.8151	4.76711	4.32187	4.46558	123.842	139.634	164.535	34.9338	31.8614	33.386	2.0953	7.50747e-15	2.61562e-14	hypothetical protein
BCR33DRAFT_712468	6.74144	9.50388	7.66645	2.0908	1.80254	0.996385	190.294	275.884	219.379	66.1248	57.3505	32.1495	2.13928	2.01453e-14	6.89313e-14	hypothetical protein
BCR33DRAFT_484666	11.9967	10.4375	8.74332	3.47068	3.57306	3.32474	277.134	247.957	204.754	89.8299	93.0353	87.7929	1.43084	1.73247e-12	5.39642e-12	CRAL/TRIO domain-containing protein
BCR33DRAFT_720240	175.294	163.453	141.411	80.5677	84.5637	79.2555	1150.82	1103.53	941.138	592.628	625.758	594.766	0.817344	1.78357e-11	5.27999e-11	ubiquitin-conjugating enzyme
BCR33DRAFT_720832	7.81297	6.22197	5.45403	2.21563	2.06976	1.93712	196.335	160.791	138.94	62.3819	58.625	55.6434	1.4896	5.63375e-10	1.52727e-09	heat shock protein 70
BCR33DRAFT_763494	31.6061	31.685	33.8775	19.526	17.3309	18.482	773.256	797.186	840.223	535.236	477.921	516.865	0.655833	4.76282e-09	1.21188e-08	DnaJ-domain-containing protein
BCR33DRAFT_771385	32.3173	25.4572	29.1235	15.5926	16.5653	16.1531	1147.05	929.204	1047.9	620.076	662.717	655.356	0.689279	1.32508e-08	3.286e-08	HCP-like protein
BCR33DRAFT_656061	28.1517	19.6344	24.7408	8.15176	10.2699	7.62567	207.662	148.943	185.01	67.3724	85.3886	64.299	1.32137	1.64161e-08	4.04866e-08	OTU-domain-containing protein
BCR33DRAFT_715562	2.62978	1.54821	1.2705	0	0.0905211	0.0433014	65.6966	39.7747	32.1757	0	2.54891	1.23652	5.19384	4.93782e-08	1.18514e-07	seven-hairpin glycosidase
BCR33DRAFT_714643	14.48	11.532	13.2067	6.69097	8.0479	7.61229	718.131	588.157	663.989	371.796	449.883	431.545	0.653429	2.72536e-06	5.79782e-06	kinase-like protein
BCR33DRAFT_753223	63.5904	69.8479	61.9014	42.7592	38.2074	40.6712	952.223	1075.61	939.675	717.391	644.875	696.161	0.527076	3.46332e-06	7.30542e-06	endoplasmic oxidoreductin
BCR33DRAFT_848432	264.043	244.003	256.937	177.569	169.074	178.739	2791.73	2653.05	2753.94	2103.52	2014.92	2160.2	0.384992	3.59569e-06	7.5709e-06	Sec62-domain-containing protein
BCR33DRAFT_717690	239.847	232.441	224.212	149.218	166.976	138.111	3069.62	3059.26	2908.97	2139.7	2408.72	2020.47	0.460384	4.46398e-06	9.35119e-06	XPC-binding-domain-containing protein
BCR33DRAFT_664904	1.13547	1.23739	1.25415	0	0.106262	0	24.1643	27.0806	27.0568	0	2.54891	0	4.96316	1.33483e-05	2.68549e-05	hypothetical protein
BCR33DRAFT_659465	80.8997	75.1054	77.875	57.5919	52.0265	51.7726	2452.67	2341.63	2393.43	1956.3	1777.87	1794.19	0.378732	1.80459e-05	3.59528e-05	hypothetical protein
BCR33DRAFT_755039	39.3937	36.1836	39.5511	27.3859	24.7981	24.3389	1110.05	1048.53	1129.8	864.613	787.614	783.954	0.433011	2.34697e-05	4.63159e-05	protein transporter SEC23
BCR33DRAFT_429443	22.3644	20.9902	20.955	11.7821	14.9544	10.7814	473.468	456.985	449.728	279.471	356.848	260.906	0.621898	5.56235e-05	0.000106562	hypothetical protein
BCR33DRAFT_714254	249.947	225.113	234.481	170.903	156.919	164.095	1683.95	1559.67	1601.47	1290.06	1191.62	1263.72	0.37147	6.29693e-05	0.000120091	ubiquitin-conjugating enzyme
BCR33DRAFT_685721	222.435	225.034	230.957	166.514	163.983	171.427	2961.63	3081.27	3117.38	2484.05	2460.98	2609.06	0.278085	0.000608544	0.00106208	WD40 repeat-like protein
BCR33DRAFT_656961	9.75782	10.8236	13.8154	4.75359	4.95722	6.36512	84.5749	96.4747	121.39	46.1626	48.4293	63.0625	0.940144	0.000703229	0.00121941	AAA-domain-containing protein
BCR33DRAFT_510711	0.81227	0.416556	0.867214	0.140918	0.0357719	0.205341	25.6745	13.5403	27.7881	4.99055	1.27446	7.41912	2.28966	0.00139976	0.00235724	hypothetical protein
BCR33DRAFT_721787	36.0913	36.9771	34.364	25.829	27.9907	24.9226	693.967	731.177	669.839	556.446	606.641	547.778	0.291976	0.00914658	0.0140664	hypothetical protein
BCR33DRAFT_714338	17.0703	15.7781	17.6299	12.8828	13.0477	11.1706	576.922	548.382	604.025	487.826	497.038	431.545	0.288646	0.0179269	0.0265491	glycoside hydrolase

## Sheet: Ubiq Proteol. TvG (UP) (Fig 3F)
	fpkm						normalised read counts
Locus tag	IMA_1_fpkm	IMA_2_fpkm	IMA_3_fpkm	GER_1_fpkm	GER_2_fpkm	GER_3_fpkm	IMA_1	IMA_2	IMA_3	GER_1	GER_2	GER_3	log2FoldChange	pvalue	padj	Annotation
BCR33DRAFT_411224	525.281	483.184	476.354	55.13	45.1877	47.8657	9686.85	9163.4	8905.34	1139.09	939.274	1009	3.16821	8.02578e-207	1.16742e-204	ubiquitin
BCR33DRAFT_700042	873.317	832.888	771.828	164.857	141.301	166.48	13131	12878.5	11764.6	2777.24	2394.7	2861.31	2.23324	2.21776e-102	7.16871e-101	ubiquitin
BCR33DRAFT_680683	108.67	89.8192	99.7958	5.10936	4.71638	2.55693	781.563	664.321	727.609	41.172	38.2337	21.0208	4.43824	2.41892e-89	6.30184e-88	ubiquitin-conjugating enzyme E2C, isoform CRA_c
BCR33DRAFT_714660	431.767	407.787	397.943	108.623	101.132	96.2678	2877.06	2794.38	2688.13	810.964	759.576	733.256	1.8594	1.74581e-86	4.26943e-85	ubiquitin-conjugating enzyme E2 N
BCR33DRAFT_722163	35.7766	31.1295	30.101	4.19364	4.48632	3.52827	1063.98	952.053	907.5	139.735	150.386	119.942	2.83452	1.41877e-80	3.13477e-79	Cullin-domain-containing protein
BCR33DRAFT_760966	33.9823	32.4567	41.4791	0.239998	0.341169	0.37303	788.359	774.336	975.507	6.23819	8.9212	9.89216	6.66304	1.3341e-77	2.80141e-76	WD40 repeat-like protein
BCR33DRAFT_713924	108.454	103.909	100.472	16.3898	18.5691	16.5921	700.008	689.709	657.407	118.526	135.092	122.415	2.44501	1.57664e-65	2.50469e-64	ubiquitin-conjugating enzyme
BCR33DRAFT_720156	15.6052	13.4233	14.271	1.68754	2.11854	1.75858	566.35	500.991	525.048	68.6201	86.663	72.9547	2.8038	5.86261e-59	8.10549e-58	TPR-like protein
BCR33DRAFT_379730	56.0731	55.1364	65.6348	14.4798	14.1997	11.6232	1638.64	1656.99	1944.43	474.102	467.725	388.267	1.97846	2.64424e-51	3.01669e-50	Cullin-domain-containing protein
BCR33DRAFT_562608	47.2724	41.3527	48.9461	3.63565	3.2101	3.53182	333.014	299.579	349.545	28.6957	25.4891	28.44	3.57132	3.92031e-50	4.35507e-49	ubiquitin-conjugating enzyme E2 G2-like protein
BCR33DRAFT_711631	79.018	69.1982	68.2789	12.8932	12.9281	15.0301	545.961	491.682	478.247	99.811	100.682	118.706	2.24721	2.82091e-43	2.66337e-42	ubiquitin-protein ligase
BCR33DRAFT_703585	27.052	29.9282	28.6693	2.18253	2.58549	2.00242	248.439	282.654	266.912	22.4575	26.7636	21.0208	3.50694	3.87615e-42	3.52157e-41	UBC-like protein
BCR33DRAFT_718540	65.7072	59.5413	69.9311	15.798	16.7541	16.8815	416.833	388.438	449.728	112.287	119.799	122.415	1.82449	5.42481e-30	3.47486e-29	hypothetical protein
BCR33DRAFT_713010	53.7729	41.5949	49.9788	18.0473	18.0503	17.5977	2654.29	2111.44	2500.93	998.11	1004.27	992.925	1.27887	3.58842e-28	2.16827e-27	WD40 repeat-like protein
BCR33DRAFT_720175	22.8847	24.9019	22.8014	7.51037	7.72767	6.46903	508.96	569.539	514.079	187.146	193.717	164.457	1.54607	1.21756e-26	6.98235e-26	hypothetical protein
BCR33DRAFT_725083	44.4894	42.0909	42.6046	9.4655	6.62843	10.1464	303.563	295.348	294.7	72.363	50.9783	79.1373	2.14031	3.57572e-26	2.01499e-25	E3 ubiquitin ligase SCF complex, Skp subunit
BCR33DRAFT_787599	3.62325	3.49507	4.27261	0.357903	0.467245	0.298013	157.823	156.56	188.666	17.4669	22.9402	14.8382	3.18982	1.31022e-25	7.21732e-25	hypothetical protein
BCR33DRAFT_711017	150.314	142.952	141.378	60.5351	60.3116	56.8167	735.5	719.329	701.283	331.872	332.633	317.786	1.13426	4.72072e-23	2.3376e-22	RING/U-box
BCR33DRAFT_766080	44.1343	40.043	46.8225	7.09805	11.0648	12.6253	491.592	458.678	528.705	88.5823	138.916	160.748	1.92977	1.01186e-20	4.60399e-20	UBC-like protein
BCR33DRAFT_754034	6.68748	8.85744	6.83055	0.53101	0.84729	0.66323	98.1673	133.711	101.646	8.73346	14.019	11.1287	3.29937	8.26277e-18	3.31651e-17	HECT-domain-containing protein
BCR33DRAFT_769888	16.3211	12.8983	20.3514	2.02094	0.373101	0.535427	98.9224	80.3956	125.046	13.724	2.54891	3.70956	3.92723	4.58315e-15	1.61696e-14	ubiquitin-conjugating enzyme 9
BCR33DRAFT_725154	18.9346	20.76	24.8151	4.76711	4.32187	4.46558	123.842	139.634	164.535	34.9338	31.8614	33.386	2.0953	7.50747e-15	2.61562e-14	ubiquitin-conjugating enzyme
BCR33DRAFT_753480	279.726	286.009	337.008	152.091	146.385	154.53	1650.72	1735.7	2016.1	1005.6	973.685	1042.39	0.838408	1.96871e-13	6.42464e-13	ubiquitin-conjugating enzyme 9
BCR33DRAFT_484666	11.9967	10.4375	8.74332	3.47068	3.57306	3.32474	277.134	247.957	204.754	89.8299	93.0353	87.7929	1.43084	1.73247e-12	5.39642e-12	CRAL/TRIO domain-containing protein
BCR33DRAFT_720240	175.294	163.453	141.411	80.5677	84.5637	79.2555	1150.82	1103.53	941.138	592.628	625.758	594.766	0.817344	1.78357e-11	5.27999e-11	ubiquitin-conjugating enzyme
BCR33DRAFT_41794	11.0929	10.8574	10.6947	2.72634	1.69175	2.20707	81.5544	82.0881	79.7079	22.4575	14.019	18.5478	2.14324	2.63586e-10	7.30589e-10	anaphase-promoting complex, subunit 10
BCR33DRAFT_770760	10.3408	11.9479	13.6866	0.183722	0.186551	0	62.676	74.4717	84.0955	1.24764	1.27446	0	6.46424	1.5408e-09	4.05498e-09	ubiquitin-conjugating enzyme 9
BCR33DRAFT_853111	44.3998	39.5507	44.3917	15.4158	12.6406	22.6046	1699.8	1557.14	1722.86	661.248	545.467	989.216	1.18107	1.54584e-09	4.0667e-09	ubiquitin-activating enzyme E1
BCR33DRAFT_659191	12.3533	10.1368	10.5312	3.48366	4.4953	1.9741	189.538	159.945	163.803	59.8866	77.7418	34.6226	1.57732	1.93986e-08	4.76652e-08	WD40 repeat-like protein
BCR33DRAFT_658324	17.3676	17.3878	17.8495	9.64746	10.7826	8.76514	278.644	286.885	290.312	173.422	194.992	160.748	0.694152	9.00018e-06	1.83794e-05	HECT-domain-containing protein
BCR33DRAFT_659465	80.8997	75.1054	77.875	57.5919	52.0265	51.7726	2452.67	2341.63	2393.43	1956.3	1777.87	1794.19	0.378732	1.80459e-05	3.59528e-05	hypothetical protein
BCR33DRAFT_714254	249.947	225.113	234.481	170.903	156.919	164.095	1683.95	1559.67	1601.47	1290.06	1191.62	1263.72	0.37147	6.29693e-05	0.000120091	ubiquitin-conjugating enzyme
BCR33DRAFT_754749	102.836	99.2594	89.3696	67.7422	67.6677	64.8723	1665.07	1652.76	1466.92	1228.92	1234.95	1200.66	0.384608	0.000100035	0.000187552	hypothetical protein
BCR33DRAFT_712228	55.6275	53.1874	57.9464	42.2358	35.2013	38.658	1268.62	1247.4	1339.68	1079.21	904.864	1007.76	0.36599	0.00071067	0.00123139	hypothetical protein
BCR33DRAFT_302348	0.726661	0.416783	0.949889	0	0.229065	0	14.3475	8.46269	19.0129	0	5.09783	0	3.05471	0.00513259	0.00814171	HECT-domain-containing protein
BCR33DRAFT_721787	36.0913	36.9771	34.364	25.829	27.9907	24.9226	693.967	731.177	669.839	556.446	606.641	547.778	0.291976	0.00914658	0.0140664	hypothetical protein
