# Supplementary material for: A cellular and molecular atlas reveals the basis of chytrid development
Source: eLife. 2022 Mar 1;11:e73933. doi: 10.7554/eLife.73933 (PMC8887899; doi:10.7554/eLife.73933)
Supplement: Figure 4—source data 1. [file elife-73933-fig4-data1.xlsx]

## Sheet:  GT2 Genes (TvG)
			fpkm						normalised read counts
Type	Accession	Locus tag	IMA_1_fpkm	IMA_2_fpkm	IMA_3_fpkm	GER_1_fpkm	GER_2_fpkm	GER_3_fpkm	IMA_1	IMA_2	IMA_3	GER_1	GER_2	GER_3	log2FoldChange	pvalue	padj	KEGG pathway name
BcsA	ORY27600	BCR33DRAFT_802628	0	0	0	0	0	0	0	0	0	0	0	0	NA	NA	NA
BcsA	ORY50940	BCR33DRAFT_656389	96.2408	91.2367	86.3706	91.5366	86.8275	87.9885	1671.86	1629.91	1521.03	1781.63	1700.12	1747.2	-0.116814	0.19439	0.240027
BcsA	ORY35995	BCR33DRAFT_702019	46.2288	41.1447	37.648	75.7345	73.9353	71.9441	1075.31	984.211	887.756	1973.76	1938.45	1912.89	-0.983047	2.22205e-20	9.98e-20
WcaA	ORY39348	BCR33DRAFT_720181	6.29774	5.41731	6.27817	0.0899454	0	0.0218442	311.87	275.884	315.175	4.99055	0	1.23652	7.17238	9.85947e-27	5.67e-26
WcaA	ORY40718	BCR33DRAFT_357335	0.680115	0.247055	0.519749	0.0445743	0.158412	0.108254	33.981	12.694	26.3255	2.49527	8.9212	6.1826	2.05857	0.00262464	0.00429565
WcaA	ORY53021	BCR33DRAFT_711410	249.23	254.929	253.702	108.912	113.862	110.552	2497.22	2626.82	2576.98	1222.68	1285.93	1266.2	1.0286	8.91435e-34	6.43e-33
WcaA	ORY53476	BCR33DRAFT_710896	20.7365	26.7741	23.5197	22.7599	24.5252	24.1404	298.277	396.054	342.963	366.805	397.63	396.923	-0.164101	0.281221	0.334545	N-Glycan biosynthesis / Metabolic pathways
Chitin Synthase 2	ORY39038	BCR33DRAFT_720298	1.00482	0.582451	0.510563	7.56631	3.39323	2.51133	35.4913	21.1567	18.2816	299.433	135.092	101.395	-2.83747	2.36026e-11	6.93e-11
Chitin Synthase 2	ORY51535	BCR33DRAFT_752847	1.6953	0.781622	0.685152	0	0	0	19.6335	9.30896	8.04392	0	0	0	5.74251	7.23519e-05	0.000137328	Amino sugar and nucleotide sugar metabolism / Metabolic pathways
Chitin Synthase 2	ORY44681	BCR33DRAFT_784768	15.5288	16.1504	16.6441	15.1754	13.2637	15.3158	761.174	814.111	827.061	833.422	732.812	858.145	-0.013419	0.905535	0.921237	Amino sugar and nucleotide sugar metabolism / Metabolic pathways
Chitin Synthase 2	ORY38111	BCR33DRAFT_758801	35.4048	35.5137	37.4078	0.329604	0.200807	0.256153	598.065	616.93	640.588	6.23819	3.82337	4.94608	6.94786	9.71228e-57	1.27e-55	Amino sugar and nucleotide sugar metabolism / Metabolic pathways
Chitin Synthase 2	ORY52472	BCR33DRAFT_655499	1.18387	0.986575	1.26395	0	0	0	25.6745	22.003	27.7881	0	0	0	6.77155	1.61737e-07	3.76e-07	Amino sugar and nucleotide sugar metabolism / Metabolic pathways
Chitin Synthase 2	ORY36855	BCR33DRAFT_721786	4.76607	3.12826	3.65273	0.953252	1.03355	0.910334	328.483	221.722	255.212	73.6106	80.2908	71.7181	1.83709	1.96138e-16	7.44e-16	Amino sugar and nucleotide sugar metabolism / Metabolic pathways
Chitin Synthase 2	ORY53285	BCR33DRAFT_733022	23.3911	17.6438	17.8798	22.4519	20.5243	19.698	1628.82	1263.48	1262.16	1751.68	1610.91	1567.91	-0.24691	0.0617796	0.0841978	Amino sugar and nucleotide sugar metabolism / Metabolic pathways
Chitin Synthase 2	ORY46363	BCR33DRAFT_715478	0	0.0304667	0.0801191	0	0.0418614	0	0	0.846269	2.1938	0	1.27446	0	1.17945	0.657321	1	Amino sugar and nucleotide sugar metabolism / Metabolic pathways
Chitin Synthase 2	ORY49570	BCR33DRAFT_713883	52.3711	43.1701	44.5622	43.6886	42.2727	41.5659	3884.4	3292.83	3350.66	3630.62	3534.07	3524.08	-0.0217924	0.825429	0.853167	Amino sugar and nucleotide sugar metabolism / Metabolic pathways
Chitin Synthase 1	ORY46998	BCR33DRAFT_715381	6.52453	6.0912	5.06152	0.0612822	0	0	237.112	227.646	186.473	2.49527	0	0	8.02163	1.43704e-14	4.95e-14	Amino sugar and nucleotide sugar metabolism / Metabolic pathways
Chitin Synthase 1	ORY52914	BCR33DRAFT_675086	18.1392	20.5258	14.7328	47.5718	37.3122	40.4245	610.148	710.02	502.379	1792.86	1414.65	1554.31	-1.38647	4.76724e-19	2.01e-18	Amino sugar and nucleotide sugar metabolism / Metabolic pathways
Chitin Synthase 1	ORY52915	BCR33DRAFT_711327	0.0654354	0	0.0208359	0.128658	0.0653192	0.187475	2.2654	0	0.731265	4.99055	2.54891	7.41912	-2.2966	0.0872941	0.115663	Amino sugar and nucleotide sugar metabolism / Metabolic pathways
Chitin Synthase 1	ORY48890	BCR33DRAFT_695431	2.76756	2.17929	2.25144	0.15798	0.160412	0.332515	117.046	94.7821	96.527	7.48582	7.64674	16.0748	3.30153	1.31308e-16	5.02e-16	Amino sugar and nucleotide sugar metabolism / Metabolic pathways
Chitin Synthase 1	ORY48846	BCR33DRAFT_735065	0.685122	0.555624	0.669689	0.352432	0.286286	0.547788	32.4707	27.0806	32.1757	18.7146	15.2935	29.6765	0.526168	0.217871	0.265871	Amino sugar and nucleotide sugar metabolism / Metabolic pathways
Chitin Synthase 1	ORY48844	BCR33DRAFT_781869	1.29056	0.643609	0.417905	0.0967682	0.393032	0.282014	44.5528	22.8493	14.6253	3.74291	15.2935	11.1287	1.44519		0.0385119	Amino sugar and nucleotide sugar metabolism / Metabolic pathways
Chitin Synthase 1	ORY48853	BCR33DRAFT_695404	51.0489	47.0928	39.2776	104.7	85.6906	78.6616	1746.62	1656.99	1362.35	4013.65	3304.66	3076.46	-1.12517	1.99572e-15	7.18e-15	Amino sugar and nucleotide sugar metabolism / Metabolic pathways
Chitin Synthase 1	ORY48847	BCR33DRAFT_657246	40.0374	40.3536	30.8921	30.1103	25.492	24.1514	1095.7	1135.69	857.043	923.252	786.34	755.514	0.32481	0.0280477	0.0403098	Amino sugar and nucleotide sugar metabolism / Metabolic pathways
Chitin Synthase 1	ORY48850	BCR33DRAFT_677174	33.016	29.9214	31.0639	0	0.135349	0.0971175	1103.25	1028.22	1052.29	0	5.09783	3.70956	8.50412	2.13962e-52	2.5e-51	Amino sugar and nucleotide sugar metabolism / Metabolic pathways
Chitin Synthase 1	ORY43398	BCR33DRAFT_820022	0.046691	0	0	0	0	0	1.51027	0	0	0	0	0	1.13286	0.779216	1	Amino sugar and nucleotide sugar metabolism / Metabolic pathways
Chitin Synthase 1	ORY48848	BCR33DRAFT_12012	27.2049	27.6421	29.3163	0.0957453	0.0648129	0.0930111	949.202	991.827	1036.93	3.74291	2.54891	3.70956	8.21523	2.66387e-55	3.37e-54	Amino sugar and nucleotide sugar metabolism / Metabolic pathways

## Sheet:  GT2 Genes (GvZ)
			fpkm						normalised read counts
Type	Accession	Locus tag	GER_1_fpkm	GER_2_fpkm	GER_3_fpkm	ZSP_1_fpkm	ZSP_2_fpkm	ZPS_3_fpkm	GER_1	GER_2	GER_3	ZSP_1	ZSP_2	ZPS_3	log2FoldChange	pvalue	padj	KEGG pathway name
BcsA	ORY27600	BCR33DRAFT_802628	0	0	0	0	0	1.04808	0	0	0	0	0	6.82876	-4.63637	0.226952	0.302938
BcsA	ORY50940	BCR33DRAFT_656389	91.5366	86.8275	87.9885	109.49	126.612	128.795	720.412	675.458	699.947	700.879	807.866	824.573	-0.157001	0.277296	0.359199
BcsA	ORY35995	BCR33DRAFT_702019	75.7345	73.9353	71.9441	128.535	215.78	200.541	798.103	770.144	766.325	1101.71	1843.55	1719.14	-0.999759	2.3686e-05	6.2e-05
WcaA	ORY39348	BCR33DRAFT_720181	0.0899454	0	0.0218442	0.251036	0.0963447	0.0935415	2.01796	0	0.495362	4.58091	1.75242	1.70719	-1.64396	0.32597	0.410242
WcaA	ORY40718	BCR33DRAFT_357335	0.0445743	0.158412	0.108254	0	0.286474	0	1.00898	3.54438	2.47681	0	5.25726	0	0.369898	0.825584	0.866112
WcaA	ORY53021	BCR33DRAFT_711410	108.912	113.862	110.552	23.5734	24.7607	21.7287	494.4	510.897	507.251	87.0372	91.1258	80.2379	2.55057	2.00751e-38	2.29e-37
WcaA	ORY53476	BCR33DRAFT_710896	22.7599	24.5252	24.1404	3.88913	6.63378	3.54242	148.32	157.978	159.011	20.6141	35.0484	18.7791	2.63223	3.45938e-15	1.73e-14	N-Glycan biosynthesis / Metabolic pathways
Chitin Synthase 2	ORY39038	BCR33DRAFT_720298	7.56631	3.39323	2.51133	16.366	37.4164	31.4753	121.078	53.6721	40.6197	213.012	485.42	409.726	-2.36521	1.04231e-06	3.07e-06
Chitin Synthase 2	ORY51535	BCR33DRAFT_752847	0	0	0	0	0	0	0	0	0	0	0	0	NA	NA	NA	Amino sugar and nucleotide sugar metabolism / Metabolic pathways
Chitin Synthase 2	ORY44681	BCR33DRAFT_784768	15.1754	13.2637	15.3158	1.52171	6.3268	6.04822	336.999	291.146	343.781	27.4854	113.907	109.26	1.9418	1.64775e-05	4.37e-05	Amino sugar and nucleotide sugar metabolism / Metabolic pathways
Chitin Synthase 2	ORY38111	BCR33DRAFT_758801	0.329604	0.200807	0.256153	2.94374	1.12977	0.822675	2.52245	1.51902	1.98145	18.3236	7.00968	5.12157	-2.29988	0.0115741	0.0216015	Amino sugar and nucleotide sugar metabolism / Metabolic pathways
Chitin Synthase 2	ORY52472	BCR33DRAFT_655499	0	0	0	0	0	0	0	0	0	0	0	0	NA	NA	NA	Amino sugar and nucleotide sugar metabolism / Metabolic pathways
Chitin Synthase 2	ORY36855	BCR33DRAFT_721786	0.953252	1.03355	0.910334	0.541121	0.761477	1.68028	29.7649	31.8995	28.731	13.7427	19.2766	42.6798	0.231882	0.641666	0.710912	Amino sugar and nucleotide sugar metabolism / Metabolic pathways
Chitin Synthase 2	ORY53285	BCR33DRAFT_733022	22.4519	20.5243	19.698	6.51622	8.77009	10.1115	708.304	640.014	628.119	167.203	224.31	259.493	1.59454	1.31064e-13	6.08e-13	Amino sugar and nucleotide sugar metabolism / Metabolic pathways
Chitin Synthase 2	ORY46363	BCR33DRAFT_715478	0	0	0	0	0	0	0	0	0	0	0	0	NA	NA	NA	Amino sugar and nucleotide sugar metabolism / Metabolic pathways
Chitin Synthase 2	ORY49570	BCR33DRAFT_713883	43.6886	42.2727	41.5659	23.5488	55.8346	62.2666	1468.07	1404.08	1411.78	643.617	1521.1	1702.07	0.146656	0.681272	0.745649	Amino sugar and nucleotide sugar metabolism / Metabolic pathways
Chitin Synthase 1	ORY46998	BCR33DRAFT_715381	0.0612822	0	0	0	0	0.254929	1.00898	0	0	0	0	3.41438	-1.79051	0.59641	1	Amino sugar and nucleotide sugar metabolism / Metabolic pathways
Chitin Synthase 1	ORY52914	BCR33DRAFT_675086	47.5718	37.3122	40.4245	589.482	944.092	832.342	724.952	562.038	622.67	7306.55	11664.1	10318.3	-3.93914	2.86372e-63	5.43e-62	Amino sugar and nucleotide sugar metabolism / Metabolic pathways
Chitin Synthase 1	ORY52915	BCR33DRAFT_711327	0.128658	0.0653192	0.187475	1.25679	0.275622	0.535206	2.01796	1.01268	2.97217	16.0332	3.50484	6.82876	-2.0972	0.0339697	0.057628	Amino sugar and nucleotide sugar metabolism / Metabolic pathways
Chitin Synthase 1	ORY48890	BCR33DRAFT_695431	0.15798	0.160412	0.332515	0	0.225626	0.109531	3.02694	3.03804	6.43971	0	3.50484	1.70719	1.18763	0.363098	0.447933	Amino sugar and nucleotide sugar metabolism / Metabolic pathways
Chitin Synthase 1	ORY48846	BCR33DRAFT_735065	0.352432	0.286286	0.547788	0.262302	8.15413	7.62367	7.56735	6.07608	11.8887	4.58091	141.946	133.161	-3.4579	0.000112313	0.00027373	Amino sugar and nucleotide sugar metabolism / Metabolic pathways
Chitin Synthase 1	ORY48844	BCR33DRAFT_781869	0.0967682	0.393032	0.282014	3.06089	6.21917	6.70913	1.51347	6.07608	4.45826	38.9377	78.8589	85.3595	-4.08411	3.18138e-12	1.37e-11	Amino sugar and nucleotide sugar metabolism / Metabolic pathways
Chitin Synthase 1	ORY48853	BCR33DRAFT_695404	104.7	85.6906	78.6616	32.7006	42.8097	41.6995	1622.94	1312.94	1232.46	412.282	537.993	525.815	1.49496	2.72833e-13	1.24e-12	Amino sugar and nucleotide sugar metabolism / Metabolic pathways
Chitin Synthase 1	ORY48847	BCR33DRAFT_657246	30.1103	25.492	24.1514	1.5899	12.378	8.29401	373.323	312.412	302.666	16.0332	124.422	83.6523	2.12933	0.000118637	0.000288552	Amino sugar and nucleotide sugar metabolism / Metabolic pathways
Chitin Synthase 1	ORY48850	BCR33DRAFT_677174	0	0.135349	0.0971175	0	0.14278	0.138626	0	2.02536	1.48609	0	1.75242	1.70719	-0.0366257	0.985736	0.988831	Amino sugar and nucleotide sugar metabolism / Metabolic pathways
Chitin Synthase 1	ORY43398	BCR33DRAFT_820022	0	0	0	0	0	0	0	0	0	0	0	0	NA	NA	NA	Amino sugar and nucleotide sugar metabolism / Metabolic pathways
Chitin Synthase 1	ORY48848	BCR33DRAFT_12012	0.0957453	0.0648129	0.0930111	0	0.273486	0.531057	1.51347	1.01268	1.48609	0	3.50484	6.82876	-1.41879	0.28814	0.370716	Amino sugar and nucleotide sugar metabolism / Metabolic pathways

## Sheet: Nile Red fluo.  (Fig. 4E)
	Nile Red Fluorescence (AU)							Area from Brightfield (AU)
Time (h)	Rep1	Rep2	Rep3	Rep4	Rep5	Mean		Rep1	Rep2	Rep3	Rep4	Rep5	Mean
0.25	0.0189252	0.0355108	0.0153164	0.11129	0.00808251	0.0378249		0.000647916	0.0333862	0.0551124	0.15448	0.000926033	0.0489105
0.5	0.0100104	0	0.00275677	0.0902013	0	0.0205937		0	0	0.0202785	0.135718	0	0.0311993
0.75	0.00552293	0.033038	0.0175282	0.0793813	0.000785927	0.0272513		0.00748049	0.0513058	0.0511694	0.127038	0.00625072	0.048649
1	0.00650382	0.0312219	0	0.0839067	0.00306122	0.0249387		0.0156678	0.058725	0	0.137603	0.00875101	0.0441494
1.25	0.00326452	0.043575	2.68457e-05	0.0810332	0.00858843	0.0272976		0.0137829	0.0852604	0.0232752	0.134666	0.0202801	0.0554529
1.5	0	0.0374182	0.0112765	0.0735265	0.00120897	0.024686		0.0127816	0.0732641	0.0328286	0.124671	0.0133349	0.0513761
1.75	0.00600283	0.0470149	0.0236896	0.0784547	0.00347366	0.0317271		0.0232366	0.0924103	0.0605426	0.133526	0.0216923	0.0662816
2	0.00837999	0.045519	0.0221943	0.0855061	0.000112269	0.0323423		0.0342512	0.0976755	0.057974	0.148036	0.0181734	0.071222
2.25	0.00926653	0.0566562	0.0267204	0.0858172	0.00541982	0.036776		0.0380504	0.119753	0.0899013	0.150228	0.0308369	0.085754
2.5	0.0136636	0.0520981	0.0420359	0.107433	0.00169836	0.0433857		0.0491238	0.115595	0.111306	0.189549	0.0263688	0.0983887
2.75	0.0169506	0.0562627	0.0410365	0.0992913	0.0163794	0.0459841		0.0555441	0.123972	0.125276	0.182009	0.0533395	0.108028
3	0.0213964	0.0698467	0.0518832	0.11032	0.0177178	0.0542327		0.0677367	0.154187	0.130481	0.200815	0.0572057	0.122085
3.25	0.0220223	0.0768032	0.0750088	0.111843	0.0217948	0.0614945		0.0710646	0.166991	0.148957	0.200728	0.0649381	0.130536
3.5	0.0310584	0.0776217	0.0623197	0.125929	0.0236978	0.0641252		0.0877043	0.172615	0.149926	0.227731	0.0692673	0.141449
3.75	0.0343074	0.0949039	0.0661839	0.130879	0.0349756	0.0722501		0.0966279	0.207766	0.179848	0.241057	0.0916078	0.163381
4	0.0412897	0.0937143	0.0683028	0.13024	0.0420331	0.0751159		0.111235	0.206211	0.189288	0.237331	0.105174	0.169848
4.25	0.0490285	0.104328	0.10329	0.142983	0.0479823	0.0895224		0.127404	0.225865	0.198481	0.263984	0.115291	0.186205
4.5	0.0529049	0.110708	0.108332	0.158863	0.0506933	0.0963001		0.1335	0.239088	0.211978	0.289541	0.121449	0.199111
4.75	0.0642355	0.11881	0.105273	0.169024	0.0596564	0.1034		0.153262	0.257845	0.211392	0.306418	0.138697	0.213523
5	0.069269	0.12974	0.100578	0.189002	0.0674048	0.111199		0.163982	0.282436	0.215876	0.343416	0.152124	0.231567
5.25	0.0831999	0.140696	0.132186	0.20145	0.0746499	0.126436		0.18713	0.30233	0.241044	0.372567	0.166732	0.253961
5.5	0.0878036	0.141252	0.108298	0.216567	0.0814394	0.127072		0.196819	0.305741	0.246767	0.397905	0.17847	0.26514
5.75	0.0998052	0.149222	0.122447	0.229418	0.0997272	0.140124		0.217729	0.321207	0.275202	0.417368	0.211043	0.28851
6	0.114313	0.141618	0.131523	0.245971	0.105203	0.147725		0.242939	0.311933	0.299603	0.454147	0.22153	0.306031
6.25	0.127528	0.153117	0.187361	0.257659	0.12932	0.170997		0.267589	0.331618	0.34176	0.473435	0.263109	0.335502
6.5	0.137641	0.159002	0.18325	0.271888	0.139276	0.178211		0.290914	0.34526	0.360687	0.50057	0.283899	0.356266
6.75	0.159709	0.176081	0.203076	0.293383	0.142493	0.194949		0.326373	0.375983	0.402843	0.539102	0.289941	0.386849
7	0.182216	0.183657	0.296535	0.317191	0.164991	0.228918		0.364954	0.387591	0.442792	0.57347	0.33064	0.419889
7.25	0.201176	0.208263	0.28965	0.343327	0.187008	0.245885		0.401944	0.432495	0.494728	0.615159	0.370923	0.463049
7.5	0.221325	0.229876	0.349936	0.362532	0.210341	0.274802		0.43431	0.47324	0.532851	0.654875	0.410302	0.501116
7.75	0.246533	0.2563	0.430851	0.38743	0.225511	0.309325		0.475335	0.51255	0.568609	0.681878	0.435907	0.534856
8	0.270545	0.287002	0.432723	0.414517	0.262644	0.333486		0.513827	0.572352	0.622707	0.727336	0.495497	0.586344
8.25	0.297079	0.322394	0.38969	0.509084	0.286116	0.360873		0.56245	0.638765	0.720427	0.824478	0.534692	0.656162
8.5	0.342011	0.354109	0.464711	0.574255	0.318673	0.410752		0.627124	0.692434	0.780767	0.91785	0.583447	0.720325
8.75	0.397141	0.40686	0.531967	0.57127	0.356202	0.452688		0.699043	0.781165	0.842594	0.950377	0.64225	0.783086
9	0.440861	0.49842	0.635185	0.637778	0.404126	0.523274		0.761361	0.88629	0.886846	0.962388	0.71844	0.843065
9.25	0.496294	0.578884	0.559915	0.629458	0.455125	0.543935		0.822441	0.942083	0.924429	0.97006	0.795092	0.890821
9.5	0.559291	0.58915	0.69317	0.845783	0.500765	0.637632		0.869946	0.979537	0.949439	1	0.86135	0.932054
9.75	0.623941	0.636658	0.983524	0.838747	0.545921	0.725758		0.905345	0.981243	0.991506	0.989435	0.915407	0.956587
10	0.681906	0.758447	0.984645	0.986006	0.65332	0.812865		0.931998	0.989918	1	0.994257	0.963028	0.97584
10.25	0.739519	0.804233	0.747208	0.923096	0.69702	0.782215		0.947283	0.9895	0.93975	0.973786	0.927538	0.955571
10.5	0.809129	0.876508	0.863352	0.963821	0.787753	0.860113		0.965071	0.991115	0.948132	0.970629	0.992499	0.973489
10.75	0.87017	0.938035	0.778281	1	0.840401	0.885377		0.983154	0.99279	0.939615	0.965413	0.996273	0.975449
11	0.927312	1	0.878981	0.965171	0.867677	0.927828		0.997497	1	0.922671	0.893696	0.962565	0.955286
11.25	0.987438	0.906972	1	0.865278	0.949525	0.941843		1	0.854908	0.928687	0.772225	1	0.911164
11.5	1	0.915697	0.887154	0.582248	1	0.87702		0.963481	0.803153	0.895701	0.529634	0.995972	0.837588
11.75	0.95734	0.734659	0.730958	0.412106	0.977691	0.762551		0.847327	0.620606	0.835001	0.357268	0.928672	0.717775
12	0.785892	0.618807	0.78228	0.2375	0.920717	0.669039		0.691386	0.462949	0.817358	0.204454	0.822086	0.599647
12.25	0.653399	0.541421	0.697817	0.138304	0.739406	0.554069		0.553615	0.353576	0.647402	0.0763633	0.618312	0.449854
12.5	0.653523	0.440202	0.536457	0	0.505367	0.42711		0.50511	0.240105	0.456604	0	0.386017	0.317567
12.75	0.563105	0.259128	0.331851	0	0.362647	0.303346		0.40374	0.080085	0.305056	0	0.240745	0.205925

## Sheet: Nile Red fluo.  (Fig. 4F)
	Nile Red Fluorescence - Live Cells (% of original)						Nile Red Fluorescence - Fixed Control (% of original)
Time (mins)	Rep 1	Rep 2	Rep 3	Rep 4	Rep 5		Rep 1	Rep 2	Rep 3	Rep 4	Rep 5
0	100	100	100	100	100		100	100	100	100	100
0.5	99.1757	96.688	95.9927	100.209	102.419		108.362	101.763	106.636	104.555	102.604
1	98.3553	98.4136	96.1712	97.8004	96.4182		109.74	99.0597	100.428	106.922	108.215
1.5	95.2878	98.2305	94.3488	96.6656	96.1286		108.403	96.0904	101.504	106.41	110.603
2	96.9433	95.6412	91.7277	93.7458	94.1746		108.528	94.7942	105.898	105.489	107.545
2.5	96.277	95.3869	90.0242	93.5285	98.247		105.429	99.7623	102.165	104.142	106.823
3	96.8767	92.8074	85.5367	92.3952	96.6153		106.575	95.9987	100.294	102.648	109.623
3.5	95.7955	93.2169	85.3329	91.0182	96.1777		107.582	92.6108	102.46	103.288	117.441
4	95.8343	90.735	82.3313	91.8212	99.0904		108.144	92.8627	101.709	104.925	117.836
4.5	94.2455	89.1803	81.2446	89.7809	95.7814		106.935	94.8543	102.594	104.525	113.182
5	93.6829	94.4501	78.3875	90.7359	99.1655		108.894	94.0658	101.119	105.312	109.912
5.5	93.0951	92.8177	78.1637	89.122	97.7738		109.369	96.1136	103.568	104.299	112.385
6	93.2834	91.591	77.7497	88.5991	96.0456		107.5	97.1901	108.517	105.737	113.925
6.5	92.0081	92.1539	76.9248	87.8969	94.6985		106.298	95.4174	107.267	106.316	117.09
7	92.0233	93.8341	77.1481	85.8778	99.4687		108.837	97.3477	105.232	111.632	116.707
7.5	92.4621	92.9905	77.0458	87.0416	102.933		108.231	94.4035	104.147	108.754	113.246
8	90.6082	92.009	73.5918	85.6667	97.5254		106.238	93.5769	104.264	107.616	109.951
8.5	89.3153	94.0069	73.1617	83.9146	93.8465		106.099	95.2263	103.308	107.087	114.252
9	89.0803	96.2028	71.7912	81.1589	90.1778		109.225	95.3606	105.573	114.388	123.199
9.5	88.9013	91.505	72.8086	79.7043	90.4121		115.949	93.1959	102.261	113.094	122.844
10	89.4951	84.6857	71.0572	79.2437	88.9245		107.745	93.8501	103.706	114.004	127.817
10.5	87.127	82.2944	70.1239	78.1062	89.0707		105.885	95.1094	102.64	115.357	134.043
11	85.2508	84.9134	69.1483	80.7226	85.6002		105.19	94.4507	113.296	115.833	132.974
11.5	84.8835	85.8781	65.4957	76.0048	83.4186		106.44	92.9989	109.486	108.949	135.706
12	83.1101	94.8525	66.2937	74.8673	88.4242		104.896	97.4168	104.48	109.198	135.907
12.5	82.0742	83.974	64.1588	73.8475	85.5301		107.635	95.2728	102.249	109.243	135.539
13	81.6592	83.809	64.1458	73.2418	84.1706		106.399	97.4614	102.744	108.4	133.321
13.5	82.3341	82.1054	62.9333	76.6274	86.171		106.948	95.092	107.353	107.431	129.881
14	81.3932	82.3429	62.7453	75.6059	82.7597		110.824	93.0667	103.932	109.312	126.11
14.5	81.1403	83.3127	61.7131	72.634	83.8494		106.748	92.6793	103.63	109.02	125.743
15	79.8902	83.3871	62.2385	71.3714	84.5506		104.151	92.5204	103.119	107.841	122.567
15.5	80.747	82.7227	62.6865	69.4694	81.333		104.034	93.7326	103.656	107.054	125.29
16	79.7935	83.2681	63.1567	68.63	83.9809		107.06	96.9144	103.547	109.104	118.606
16.5	78.2163	83.2804	62.2903	66.9992	81.5436		101.299	95.2592	102.516	113.073	117.499
17	77.5505	81.2534	61.9473	67.2219	82.5915		102.019	94.7465	103.188	108.836	114.704
17.5	76.6238	79.0678	59.1023	67.8365	85.0757		101.713	96.9079	104.983	105.156	115.369
18	76.5261	77.5008	58.1002	69.1012	87.5198		100.869	96.6477	103.766	107.703	115.223
18.5	75.3132	75.9881	57.6644	67.5131	85.1739		104.266	96.3816	109.323	105.681	114.881
19	74.3959	80.1134	57.3736	65.8047	84.9006		117.542	101.349	107.413	106.655	112.168
19.5	74.0588	76.8318	56.6936	65.4729	85.511		116.448	97.9993	109.634	110.382	114.289
20	74.4896	80.2641	57.6331	63.1045	82.8043		115.32	97.7132	116.366	105.738	112.667
20.5	73.7063	76.4125	56.9687	62.6144	83.9724		118.827	99.7126	118.636	105.008	111.944
21	74.1084	75.0532	56.2839	61.2911	83.846		114.558	99.4046	112.006	106.057	109.299
21.5	71.403	73.1329	55.179	63.945	80.4697		114.537	98.2266	110.987	105.92	107.29
22	71.1601	74.6825	54.9818	63.6891	79.9114		111.388	98.6393	111.264	105.914	108.316
22.5	70.5615	75.105	55.6644	61.9928	81.2189		113.609	99.0236	107.227	105.216	105.151
23	70.8399	72.5455	54.0223	63.9845	79.4608		117.9	97.6312	107.171	105.35	102.311
23.5	69.4087	72.5856	55.1538	62.6745	79.4145		111.128	99.6216	110.626	109.769	105.601
24	70.0284	73.0145	56.7302	64.3538	82.2838		108.761	98.6794	111.162	106.223	104.083
24.5	69.423	74.2289	55.9535	62.3025	81.9659		103.802	96.2053	110.21	110.512	104.65
25	68.6838	75.7067	51.9919	62.3959	80.7594		104.916	100.15	106.922	105.817	103.571
25.5	68.8061	79.7588	52.9797	60.668	79.7979		107.876	96.1143	107.962	108.183	100.668
26	66.7525	77.2155	52.7185	59.5311	79.7962		101.416	97.4478	109.133	105.984	103.129
26.5	67.1258	76.0748	49.423	60.7567	79.5257		100.159	98.1737	106.213	107.241	101.402
27	64.7318	76.0981	51.4956	60.0344	77.8879		101.196	97.7539	105.556	106.782	104.063
27.5	65.73	74.7459	51.8243	62.2619	79.9853		101.155	97.7991	107.018	107.738	101.857
28	65.5846	73.2927	52.1451	61.7908	80.026		102.378	96.7768	108.11	110.384	104.37
28.5	63.9135	71.4579	50.2962	60.1251	78.064		103.43	97.1882	112.116	106.55	100.072
29	65.1437	73.0579	49.8888	59.3343	77.7078		103.66	98.0361	108.081	108.379	100.019
29.5	64.031	71.9677	50.8204	60.9767	76.4679		103.507	97.5356	107.643	108.568	101.386
30	64.3841	71.082	50.3272	60.6258	75.4144		106.307	95.1075	105.191	108.695	104.646
30.5	63.3572	69.7168	50.3916	58.8225	75.5601		107.107	99.9296	104.128	111.019	103.853
31	64.3036	68.6208	49.8413	59.8972	78.2938		108.408	100.229	110.127	110.148	105.272
31.5	63.0488	68.7269	51.8217	58.6896	79.0182		107.659	99.382	102.715	111.401	108.312
32	62.8077	67.3889	53.6492	58.6732	80.1378		105.411	100.626	104.563	113.077	109.311
32.5	62.6249	66.5951	54.1725	60.0244	78.7206		105.402	101.178	101.742	109.059	107.292
33	61.6507	64.7375	55.1821	59.4139	78.317		107.324	103.421	103.784	107.146	106.54
33.5	60.9953	65.3684	52.3637	57.6096	78.9623		116.567	105.703	101.57	107.147	106.639
34	61.7564	66.7995	53.7193	59.4577	78.7811		116.772	100.726	104.412	109.235	109.376
34.5	60.6485	67.299	50.7455	58.7782	80.3822		116.567	103.084	101.88	112.162	108.639
35	59.7377	67.2233	50.9188	59.6814	79.4044		118.41	103.102	103.222	114.9	107.264
35.5	61.1337	65.7669	51.4207	60.8817	79.0628		121.529	100.931	104.442	109.063	106.399
36	60.8405	65.8944	53.3789	58.7518	78.667		119.494	102.351	105.236	109.789	105.919
36.5	59.4586	66.8144	52.2666	58.573	77.3267		112.459	101.494	101.392	107.102	106.342
37	60.402	68.7547	50.1635	56.5248	77.8867		111.567	102.697	104.27	105.153	108.431
37.5	59.9048	67.2938	49.6463	57.9135	75.9073		117.344	101.848	104.615	110.414	105.991
38	59.5902	67.0751	51.082	56.8102	75.4709		119.53	99.4311	104.919	105.285	107.153
38.5	59.7669	66.9108	49.4473	55.7292	77.8393		120.928	104.649	103.041	110.096	108.115
39	57.9756	67.277	50.3903	56.1761	79.2		119.891	104.641	103.448	109.821	106.222
39.5	57.676	70.424	49.4508	56.7675	77.7456		119.249	99.4007	104.465	109.379	106.38
40	57.0557	68.7612	51.0194	57.3637	79.4128		121.125	100.988	103.971	109.386	107.856
40.5	58.3599	67.2977	49.5688	58.5571	75.6052		119.39	102.579	103.304	107.523	113.144
41	59.2104	66.4611	49.8143	59.3802	76.7615		120.427	104.15	105.4	109.498	111.358
41.5	57.2931	69.262	48.524	58.5513	75.2383		122.758	102.092	105.111	110.918	116.583
42	56.6607	68.2404	49.9001	57.37	76.6723		119.387	106.748	103.834	116.006	111.888
42.5	56.6913	68.0152	50.8587	58.7951	77.2883		120.105	102.744	104.439	114.374	112.892
43	57.8498	67.0467	50.3807	59.9553	76.827		123.035	103.182	105.98	115.635	112.258
43.5	57.4881	66.6015	54.0162	58.2363	75.3088		123.033	103.09	106.616	116.01	109.317
44	56.8834	68.9501	53.1456	58.9555	76.0727		123.81	106.576	108.645	114.944	111.006
44.5	56.7381	67.3857	52.7938	57.2086	74.5308		123.239	101.844	107.194	110.687	114.121
45	56.7149	67.8269	51.1508	57.7425	74.2864		124.725	105.103	105.979	106.859	111.368
45.5	57.8624	69.9918	50.9571	57.7673	77.1833		122.294	106.324	107.164	108.328	112.696
46	57.1332	73.1355	52.5221	56.834	74.318		119.17	105.927	106.015	114.256	113.832
46.5	56.7249	72.9078	50.7164	57.1458	74.0204		122.206	101.772	109.035	109.956	110.402
47	56.5661	67.4963	50.7655	56.5554	73.6529		124.045	101.786	106.385	113.73	106.612
47.5	56.2624	73.1381	50.8282	57.1906	72.9438		121.212	103.64	108.447	114.757	105.773
48	57.6372	68.0514	51.759	58.8758	74.7826		120.645	104.885	104.965	109.276	106.823
48.5	56.7245	67.1638	53.0707	58.5139	75.4003		118.817	106.537	104.114	109.545	111.839
49	57.3448	65.9028	50.3537	61.4631	75.2405		122.296	106.925	101.575	112.065	111.965
49.5	56.3375	65.9959	49.5318	58.8072	73.7014		118.763	108.577	100.385	113.044	108.515
50	55.4365	66.1784	52.1743	56.6625	74.2333		121.524	100.169	105.71	112.887	109.02
50.5	55.7827	63.8654	51.4042	56.2774	74.2643		116.082	105.545	102.423	114.891	105.74
51	54.5463	64.0589	49.8753	56.4615	75.4844		122.938	102.827	106.799	116.4	109.798
51.5	54.1902	62.2097	50.968	56.5591	73.5388		118.894	106.984	105.223	121.31	106.553
52	54.5646	63.0178	50.7494	56.91	74.3152		120.76	107.662	106.248	118.344	106.336
52.5	54.4067	64.4697	51.0006	59.1628	73.1306		121.038	106.163	108.154	121.599	105.035
53	55.8664	65.3955	53.2248	58.0438	71.1382		121.488	105.355	112.168	118.449	102.97
53.5	55.2525	66.3453	53.6066	56.2098	70.6199		123.984	107.45	112.343	116.574	106.4
54	54.9513	65.4395	51.4307	54.4477	70.2744		125.302	103.157	111.643	117.342	107.021
54.5	54.6822	69.5583	52.3637	55.8126	70.45		112.674	103.472	109.63	116.841	113.617
55	54.0357	63.252	51.2087	54.9441	70.7012		123.998	104.044	108.779	117.206	108.001
55.5	54.7181	63.7793	50.9227	55.7413	71.1461		123.707	102.908	114.606	118.706	109.262
56	54.7594	65.8038	52.4151	57.1321	71.5442		123.237	102.296	119.884	117.949	108.238
56.5	54.7414	64.0653	52.0468	55.7767	71.665		123.247	106.339	112.417	115.602	108.281
57	54.1717	62.5779	51.6288	56.7116	71.9168		120.506	105.177	109.447	115.801	110.447
57.5	54.5198	60.9533	51.7764	57.7114	73.0505		123.784	104.654	116.069	115.966	113.482
58	54.0475	61.0076	52.385	56.3111	71.4516		121.205	110.937	110.667	115.16	111.587
58.5	56.4158	62.2744	51.0694	56.8208	73.1402		123.433	112.709	109.269	115.295	109.145
59	54.1958	61.4541	51.1813	58.1825	72.4311		120.65	113.026	115.587	117.792	107.033
59.5	54.9535	60.7107	52.3193	57.5927	74.9565		123.74	113.823	112.943	116.739	105.866
60	52.4088	62.8367	52.1578	57.5821	75.0299		124.853	113.234	106.606	117.361	105.28
60.5	53.9809	64.2775	56.3214	58.8014	75.826		114.177	113.774	109.143	116.52	107.003
61	56.1701	62.8412	55.0132	59.4862	73.5247		115.563	109.789	107.555	115.334	105.018
61.5	54.1038	61.1953	54.8369	58.88	70.8988		115.575	107.823	107.637	113.546	103.526
62	54.8335	62.9531	54.7054	60.2465	70.3269		123.594	108.649	104.445	113.91	104.991
62.5	52.9895	61.4126	54.1756	59.3717	68.7037		121.488	110.585	104.019	115.231	103.369
63	52.4468	62.1496	55.758	58.6795	69.152		120.056	109.375	105.909	116.202	103.833
63.5	52.7856	62.9835	55.2387	57.9947	70.586		120.144	108.506	102.972	114.823	108.935
64	52.0023	63.7159	55.6814	57.6966	70.0429		115.394	109.459	106.343	113.88	107.821
64.5	53.5993	62.323	54.1882	58.7787	70.9779		123.405	108.882	104.143	115.256	112.156
65	54.916	61.7711	56.8068	58.1387	70.4302		121.611	108.839	105.159	113.158	108.091
65.5	52.0621	60.8155	56.8581	59.8624	69.961		118.689	108.452	104.665	115.287	105.377
66	52.6048	59.4587	56.5064	58.6663	69.4992		120.502	104.034	110.042	114.962	108.045
66.5	54.2046	61.3622	55.8495	58.4057	68.5518		115.187	105.726	112.167	114.798	113.23
67	55.7873	60.8271	54.5722	56.8688	69.5873		124.356	104.293	111.337	113.752	115.394
67.5	52.7853	62.1386	54.1277	56.805	71.49		117.064	105.883	105.663	115.49	114.14
68	53.2017	61.5304	54.7441	56.7807	69.3214		116.826	107.214	107.55	112.13	113.073
68.5	54.385	60.1627	54.2936	57.5621	66.6006		114.78	109.278	104.385	115.17	112.259
69	53.5227	61.9192	54.0167	57.9382	66.0451		118.055	105.428	105.75	116.424	111.869
69.5	53.9575	63.089	54.3497	58.6574	68.383		128.147	102.798	106.256	118.365	112.042
70	51.4675	62.8399	53.2235	58.0258	67.8591		120.161	103.113	106.362	113.44	117.051
70.5	54.0975	63.0431	53.3114	59.1222	67.9652		119.027	99.5053	112.211	113.22	117.331
71	53.1162	63.1893	51.9832	58.3266	72.8636		118.613	103.278	108.4	114.808	118.142
71.5	54.1274	65.8277	52.0428	58.1166	67.4142		126.419	102.229	107.774	114.937	112.079
72	51.9897	66.6209	53.4264	57.3389	67.1737		125.034	100.724	107.06	114.281	108.35
72.5	52.8636	65.8724	52.3032	59.8302	65.8745		119.175	99.4201	109.784	111.099	112.142
73	52.5906	65.9532	52.3258	62.1216	67.3222		122.115	99.349	110.936	113.65	110.495
73.5	51.5273	68.9398	51.2292	60.9471	68.4107		123.759	98.9422	109.486	114.179	112.147
74	50.5819	68.3918	51.0054	59.9706	66.7322		123.564	98.1524	111.758	113.995	108.58
74.5	51.0285	68.1343	51.0886	59.0119	66.6079		123.254	98.3377	111.575	111.951	106.612
75	51.3893	68.7968	52.7947	59.9036	66.1868		124.959	100.031	110.187	111.371	106.549
75.5	50.8386	63.8525	54.0624	58.8821	67.4238		122.656	97.2896	105.167	109.918	113.171
76	52.0144	64.209	54.4503	58.8853	67.6468		118.086	99.4285	108.249	114.107	105.284
76.5	52.1213	66.7135	54.3114	57.7167	67.002		117.357	97.9496	109.174	117.748	102.804
77	51.406	69.0258	52.6053	56.1993	66.8135		118.316	95.3774	107.874	110.72	102.142
77.5	52.544	67.6574	51.1334	58.1846	67.1861		117.648	96.988	104.949	110.616	102.629
78	51.1676	67.7267	50.1839	58.5344	69.1887		116.312	97.7397	109.998	112.251	101.779
78.5	50.9621	64.4762	50.6902	57.6053	69.6895		116.834	98.2583	104.936	111.577	101.102
79	51.3676	66.6611	51.4508	58.6289	68.7263		115.263	98.0962	104.36	115.123	107.491
79.5	51.6238	69.6392	49.9706	56.308	67.4193		117.564	100.026	106.515	110.453	106.557
80	51.6128	70.1962	49.0899	57.8085	66.307		112.34	100.732	109.27	112.122	110.782
80.5	51.3671	68.1841	48.5719	57.5025	65.6583		114.693	98.8699	107.63	110.953	105.898
81	50.9311	70.7656	48.4809	57.302	64.9176		117.546	101.086	106.819	109.333	104.817
81.5	50.061	71.1292	49.6785	55.5625	65.0858		113.668	101.852	107.235	111.842	105.005
82	50.9979	68.6913	49.3494	56.365	66.224		113.802	97.5428	105.335	108.649	108.425
82.5	50.3539	69.2102	50.715	56.2557	66.3228		114.865	99.0998	110.246	110.847	106.577
83	49.3604	71.0477	50.6846	57.102	70.1722		112.493	101.726	107.355	110.75	107.167
83.5	48.9533	69.9006	51.1077	57.8311	66.1681		105.974	102.427	107.733	111.285	114.61
84	48.2686	68.5425	50.4525	56.6968	66.1021		106.731	101.301	101.902	110.641	123.366
84.5	48.154	67.517	50.5178	57.5367	67.7117		106.692	101.837	106.495	110.776	115.261
85	47.5196	67.6451	51.4421	57.7267	64.4557		106.933	105.221	107.092	113.766	107.222
85.5	47.692	65.6524	50.197	57.9768	64.4241		108.96	100.907	105.472	112.355	107.35
86	47.9489	65.5799	51.1369	58.3524	63.2486		109.581	100.713	104.442	111.653	107.064
86.5	46.9423	65.1943	50.5435	57.7636	63.4592		115.471	104.426	108.344	110.415	106.842
87	48.8684	66.0289	51.5701	55.9735	63.8686		113.094	103.203	109.422	109.785	109.187
87.5	49.6113	65.2461	49.8317	56.3665	63.3604		115.143	103.28	109.287	109.66	108.76
88	48.8194	66.4333	50.0159	54.7257	64.2779		116.922	102.522	102.055	108.342	106.335
88.5	46.0915	65.6576	50.7216	57.2154	63.0691		112.071	102.425	102.367	115.821	101.51
89	45.9955	63.0411	48.1448	57.9245	61.8372		112.825	101.059	99.2351	113.03	103.067
89.5	45.4311	61.2405	48.2371	58.4411	64.0035		110.961	102.89	98.7097	110.03	103.54
90	47.5246	61.8617	47.7504	57.6866	66.3217		113.866	102.311	99.6295	110.422	104.71
90.5	49.0689	60.2526	47.6711	57.7277	66.3573		117.825	104.479	99.1968	110.079	102.117
91	49.4562	62.7552	49.1974	57.3848	66.5667		114.901	101.63	100.679	109.665	102.151
91.5	49.8035	59.0007	47.0521	56.2921	68.7297		112.148	102.012	105.734	112.072	105.246
92	48.3316	60.1795	48.2558	57.7536	66.0021		112.577	101.702	105.108	114.73	103.802
92.5	48.013	60.4629	47.7682	61.8372	62.0427		116.879	102.18	106.966	113.712	101.311
93	46.4944	62.0952	46.3873	60.4691	63.2402		115.486	104.249	105.874	116.259	100.936
93.5	45.7109	59.9711	47.0508	59.9036	65.6295		113.99	103.882	105.428	115.878	101.595
94	45.4134	59.6127	47.5645	60.457	65.7983		114.75	106.949	107.062	116.552	102.116
94.5	44.811	59.9906	46.8736	60.7862	62.3882		113.472	107.31	110.897	116.93	99.9528
95	43.9347	58.4281	46.0595	59.9415	63.0973		112.221	107.251	109.612	113.95	100.597
95.5	43.5836	62.2143	46.7948	60.1505	63.1617		112.16	107.364	107.679	113.697	101.145
96	43.5638	58.8402	47.1553	59.5569	63.1081		108.715	106.072	107.963	116.545	99.6384
96.5	43.7021	58.9043	47.8496	58.3033	65.9101		110.072	106.061	108.037	114.584	99.1023
97	45.6613	56.9516	46.4657	55.4031	64.8351		109.78	103.68	108.243	114.412	99.2582
97.5	44.422	57.0746	44.0478	56.2605	63.5609		112.871	100.865	108.686	116.386	101.287
98	45.3922	56.7025	45.1357	55.1235	62.3092		113.191	100.236	107.577	117.779	102.107
98.5	44.8785	57.5203	45.164	54.5305	61.3324		113.264	101.536	108.867	120.876	104.861
99	45.3352	55.6479	44.0217	54.7816	61.4617		111.711	101.029	105.976	115.17	104.447
99.5	45.453	56.4748	43.2429	53.8061	58.6789		113.211	100.802	107.881	119.715	103.405
100	45.6258	57.728	43.1423	52.8475	61.9303		115.226	103.41	110.669	123.219	103.76
100.5	45.0391	55.305	43.2742	52.8095	63.2052		114.318	102.65	106.139	126.74	102.667
101	45.1938	56.7465	43.6151	52.9572	60.975		116.91	102.11	106.487	118.472	106.358
101.5	44.0216	55.3037	44.1353	52.2159	62.4023		117.667	102.226	110.627	120.538	101.771
102	43.9497	56.2516	44.302	52.6586	59.0594		114.004	103.741	108.056	121.46	101.812
102.5	44.4044	56.7252	46.4339	52.447	61.5278		112.758	103.906	110.603	120.585	102.41
103	44.3337	57.7623	46.268	55.7915	64.2818		114.252	104.169	109.247	121.929	100.986
103.5	43.3337	56.3616	46.0608	58.3234	58.7805		116.286	103.803	111.211	116.781	100.494
104	43.4109	56.3984	44.7713	55.0449	60.9304		115.66	104.287	107.92	118.625	99.7569
104.5	43.1948	56.7077	44.7191	53.1065	60.2925		118.536	104.885	115.404	117.324	103.13
105	44.1037	57.541	45.2763	55.4052	59.9447		114.499	103.418	114.605	118.86	107.455
105.5	44.1827	56.5317	44.8027	58.0237	60.66		122.454	105.825	115.118	121.424	103.815
106	43.8853	55.723	43.2973	57.6159	58.6653		115.525	106.572	108.289	116.871	103.544
106.5	44.823	54.5396	43.2476	58.1783	59.266		119.011	103.616	108.372	118.219	108.647
107	44.5825	53.2715	42.5132	55.7181	60.2129		118.326	104.368	110.333	121.896	106.941
107.5	43.305	54.2802	42.6569	56.6947	57.7213		120.859	105.613	109.024	124.778	104.801
108	43.1623	53.5439	43.5136	55.6516	57.1658		123.14	102.918	105.556	122.115	103.146
108.5	43.8395	53.7749	43.1575	53.5544	57.4181		119.224	101.673	109.049	122.48	101.252
109	43.2941	53.2249	42.3243	52.3742	58.4519		115.397	103.099	110.443	119.615	106.697
109.5	43.0821	54.5118	41.5846	52.4322	58.3689		119.942	99.0617	106.522	116.08	106.645
110	43.0554	54.9641	40.148	52.5515	58.4079		120.662	102.63	107.104	112.675	106.212
110.5	43.0989	53.5581	40.5141	53.6177	57.4424		124.49	101.813	107.825	114.649	103.358
111	43.956	55.3231	41.0222	52.2186	57.0641		120.634	101.551	105.758	116.475	105.529
111.5	43.8988	55.8666	41.8985	52.7862	57.3685		123.707	102.27	104.91	115.802	107.777
112	44.7423	56.7776	41.6177	51.8044	56.9275		121.81	101.201	103.836	117.792	107.054
112.5	43.7131	57.1276	39.7906	51.2673	56.7999		122.396	103.334	102.878	114.439	104.663
113	44.743	56.2949	39.9691	52.705	57.5452		119.287	102.615	102.367	117.543	104.546
113.5	46.0728	57.8192	39.3461	54.8861	60.3325		123.18	101.762	103.665	122.013	101.129
114	45.7167	57.5359	39.175	53.0163	56.9021		119.387	102.464	103.218	118.728	102.472
114.5	45.0576	56.7187	39.0618	53.1856	57.1099		124.449	102.368	102.476	122.226	103.642
115	44.3778	55.1245	39.4158	52.4233	56.0891		119.389	101.724	99.4898	117.364	105.728
115.5	43.8722	56.7258	38.7014	51.9627	59.6844		120.18	101.451	106.91	119.064	108.859
116	44.0273	57.9202	38.2521	49.5806	56.1856		118.893	102.679	106.414	114.66	111.445
116.5	44.2186	57.6788	38.6161	50.4511	57.3357		117.258	102.039	105.758	118.062	110.119
117	43.7108	58.4358	39.4793	52.1041	56.4453		115.54	102.161	104.96	117.785	106.697
117.5	43.6981	59.6153	38.3753	49.7679	56.0829		111.215	102.158	105.041	114.006	106.82
118	44.4429	59.6852	37.8847	52.9751	56.4448		111.215	100.132	107.955	111.427	110.353
118.5	44.6707	57.0001	39.1541	52.5114	56.525		112.007	99.4175	104.744	117.021	110.962
119	43.7472	57.53	37.5094	48.9596	56.1162		115.502	100.349	101.511	120.373	116.641
119.5	44.0658	55.5244	38.0819	47.8796	62.0737		112.423	99.5867	101.069	116.7	111.768
120	43.9709	55.8815	37.4367	48.8045	62.5169		119.916	100.595	102.301	122.803	107.888

## Sheet: Lipid Profiling (Fig 4H-J)
Life Stage	Lipid mass (ng)	Lipid % of Dry Weight (%)	Polar lipids (mg)	Sphingolipids (mg)	Glycolipids (mg)	Polar lipids (%)	Sphingolipids (%)	Glycolipids (%)
Zoospore	0.00118343	72.7273	0	0.3	0.1	0	37.5	12.5
Zoospore	0.0010355	87.5	0	0.3	0.3	0	42.86	42.86
Zoospore	0.00133136	64.2857	0	0.4	0.6	0	44.44	66.66
Germling	0.00251256	71.4286	0.4	0	0	80	0	0
Germling	0.00201005	80	0.2	0	0	50	0	0
Germling	0.00201005	57.1429	0.1	0	0	25	0	0
Immature Thallus	1.10553	64.7059	0.8	0.1	0.1	72.72	9.1	9.1
Immature Thallus	0.904523	60	0.7	0.1	0.5	77.77	11.11	55.55
Immature Thallus	0.703518	58.3333	0.5	0.1	0.4	71.43	14.29	57.14
