# Supplementary material for: A cellular and molecular atlas reveals the basis of chytrid development
Source: eLife. 2022 Mar 1;11:e73933. doi: 10.7554/eLife.73933 (PMC8887899; doi:10.7554/eLife.73933)
Supplement: Figure 5—source data 1. [file elife-73933-fig5-data1.xlsx]

## Sheet: FM1-43 fluo. (Fig. 5A)
	FM1-43 (AU)							Area from Brightfield (AU)
Time (h)	Rep1	Rep2	Rep3	Rep4	Rep5	Mean		Rep1	Rep2	Rep3	Rep4	Rep5	Mean
0.25	0.0355036	0.113509	0	0.00767931	0.0524761	0.0418336		0.0468068	0.130901	0.0494846	0.0523718	0.0580436	0.0675216
0.5	0.0507197	0.113195	0.00678245	0.00808164	0.0537116	0.0464981		0.0575983	0.127014	0.0511566	0.0534257	0.0636328	0.0705655
0.75	0.0410155	0.105038	0.0120589	0	0.0545144	0.0425254		0.0511292	0.115586	0.0588398	0.0426172	0.0610586	0.0658462
1	0.0429332	0.10739	0.0176205	0.00460615	0.0597372	0.0464574		0.0531018	0.12212	0.0681121	0.0487476	0.0671239	0.071841
1.25	0.0485649	0.106461	0.0282388	0.00669852	0.0599504	0.0499827		0.0602817	0.121347	0.0712904	0.05331	0.0733479	0.0759154
1.5	0.0785826	0.112751	0.0248964	0.00241877	0.0698266	0.057695		0.0815891	0.131065	0.0740818	0.0522305	0.0884759	0.0854885
1.75	0.0489702	0.117212	0.0329586	0.0147076	0.0745552	0.0576807		0.0638934	0.137926	0.0831468	0.0690923	0.10274	0.0913597
2	0.0804595	0.118273	0.033294	0.0184022	0.0819168	0.0664692		0.100866	0.144389	0.090899	0.0754154	0.113954	0.105105
2.25	0.0565836	0.126364	0.0436933	0.0355763	0.0834721	0.0691379		0.0854184	0.153194	0.0968687	0.0973795	0.118203	0.110213
2.5	0.0813031	0.132126	0.0415361	0.0344738	0.0852913	0.0749461		0.113645	0.165137	0.109692	0.0963513	0.112014	0.119368
2.75	0.0903279	0.155958	0.0597737	0.0531778	0.107528	0.0933531		0.123073	0.193846	0.127961	0.11721	0.151844	0.142787
3	0.0999305	0.158964	0.0736337	0.060212	0.109399	0.100428		0.136954	0.197171	0.144446	0.125217	0.157698	0.152297
3.25	0.110999	0.168134	0.100242	0.0744997	0.1273	0.116235		0.14599	0.211666	0.170564	0.141757	0.181994	0.170394
3.5	0.117328	0.183569	0.109345	0.0948625	0.129965	0.127014		0.163367	0.231454	0.183125	0.166112	0.184816	0.185775
3.75	0.150275	0.200275	0.13331	0.109446	0.14602	0.147865		0.192811	0.253653	0.20453	0.180802	0.211475	0.208654
4	0.163126	0.210372	0.153967	0.120373	0.152151	0.159998		0.211697	0.262856	0.224166	0.19116	0.219815	0.221939
4.25	0.16544	0.226778	0.179279	0.139383	0.181373	0.178451		0.219602	0.277374	0.254457	0.212418	0.257987	0.244367
4.5	0.181891	0.242541	0.19644	0.153778	0.197881	0.194506		0.236703	0.30222	0.270942	0.232068	0.279445	0.264276
4.75	0.209452	0.245387	0.20406	0.175154	0.218263	0.210463		0.263043	0.301447	0.281306	0.251552	0.309154	0.281301
5	0.203771	0.260465	0.241517	0.190626	0.234111	0.226098		0.267714	0.318378	0.319639	0.270419	0.32564	0.300358
5.25	0.225304	0.267892	0.259362	0.218757	0.253738	0.245011		0.285888	0.331327	0.335904	0.301867	0.351171	0.321231
5.5	0.227976	0.291597	0.283554	0.242873	0.279425	0.265085		0.291951	0.356922	0.362822	0.324975	0.381427	0.34362
5.75	0.244462	0.306456	0.308739	0.280211	0.306463	0.289266		0.310546	0.375187	0.390971	0.360023	0.416814	0.370708
6	0.265528	0.316256	0.34289	0.319348	0.311349	0.311074		0.337554	0.383079	0.419009	0.412382	0.42674	0.395753
6.25	0.283073	0.351503	0.366183	0.344906	0.329847	0.335102		0.353509	0.427548	0.4459	0.443021	0.458336	0.425663
6.5	0.325111	0.366317	0.41306	0.378598	0.366332	0.369883		0.393078	0.439678	0.493491	0.477811	0.495857	0.459983
6.75	0.361749	0.384331	0.47526	0.414841	0.382072	0.403651		0.427426	0.458646	0.552856	0.517318	0.519007	0.49505
7	0.393527	0.396311	0.534905	0.452814	0.415698	0.438651		0.466443	0.477426	0.60364	0.554486	0.558308	0.532061
7.25	0.49655	0.430315	0.574283	0.512033	0.444828	0.491602		0.563219	0.51391	0.658362	0.615199	0.601629	0.590464
7.5	0.52756	0.462591	0.654925	0.562525	0.502093	0.541939		0.610954	0.576574	0.734723	0.665566	0.664433	0.65045
7.75	0.58749	0.500989	0.724176	0.641183	0.550208	0.600809		0.66407	0.616874	0.791836	0.737742	0.725933	0.707291
8	0.658942	0.538889	0.825045	0.739259	0.611499	0.674727		0.732257	0.666776	0.881851	0.856572	0.79221	0.785933
8.25	0.739224	0.600015	0.892398	0.825568	0.640978	0.739636		0.813426	0.728667	0.936365	0.930985	0.842249	0.850338
8.5	0.745399	0.664876	0.933372	0.885683	0.714922	0.78885		0.83994	0.794282	0.968369	0.975607	0.929138	0.901467
8.75	0.800646	0.69343	0.932626	0.917299	0.745552	0.81791		0.898119	0.860739	0.997927	0.993394	0.965107	0.943057
9	0.865246	0.788819	0.935054	0.914639	0.775006	0.855753		0.902456	0.939748	0.998853	0.999961	0.993265	0.966857
9.25	0.825551	0.776429	0.958644	0.93762	0.817998	0.863249		0.90833	0.960519	0.999765	1	1	0.973723
9.5	0.882036	0.866984	1	0.941421	0.852078	0.908504		0.906604	0.989017	1	0.996376	0.997197	0.977839
9.75	0.942248	0.890577	0.993063	0.942692	0.869128	0.927542		0.918657	1	0.98947	0.990027	0.977467	0.975124
10	0.957883	0.922214	0.989574	0.946333	0.919878	0.947176		0.90263	0.996932	0.986928	0.985837	0.978172	0.9701
10.25	0.840699	0.935331	0.994456	0.994298	0.980157	0.948988		0.859174	0.979393	0.943357	0.973191	0.914751	0.933973
10.5	0.857291	0.95721	0.979233	1	1	0.958747		0.861175	0.97478	0.926153	0.973178	0.912212	0.9295
10.75	0.871556	0.972446	0.914894	0.927742	0.954734	0.928274		0.862176	0.969534	0.864909	0.900538	0.857483	0.890928
11	1	0.928455	0.656696	0.695425	0.786944	0.813504		1	0.902983	0.617002	0.677338	0.699044	0.779274
11.25	0.703928	1	0.388511	0.354102	0.548571	0.599023		0.7181	0.968457	0.362656	0.357491	0.489915	0.579324
11.5	0.441607	0.804158	0.250569	0.171725	0.44087	0.421786		0.449676	0.754238	0.230025	0.113997	0.412794	0.392146
11.75	0.247995	0.561625	0.112633	0.120206	0.253418	0.259175		0.260491	0.514308	0.124202	0.0222082	0.224363	0.229114
12	0.10467	0.246253	0.0349145	0.129609	0.123102	0.12771		0.115922	0.207404	0.026518	0.0227223	0.0971507	0.0939435
12.25	0.0659406	0.170156	0.0334331	0.16038	0.0849702	0.102976		0.0717694	0.140432	0.0294752	0.0339035	0.0735066	0.0698173
12.5	0.0281697	0.156037	0.0117508	0.116709	0	0.0625334		0.029024	0.12699	0.00301246	5.14079e-05	0	0.0318157
12.75	0	0	0.00834834	0.118157	0	0.0253011		0	0	0	0	0	0
