# Supplementary material for: A cellular and molecular atlas reveals the basis of chytrid development
Source: eLife. 2022 Mar 1;11:e73933. doi: 10.7554/eLife.73933 (PMC8887899; doi:10.7554/eLife.73933)
Supplement: Figure 6—source data 1. [file elife-73933-fig6-data1.xlsx]

## Sheet: Phagosome MvZ (UP) (Fig 6I)
	fpkm						normalised read counts
Locus tag	MAT_1_fpkm	MAT_2_fpkm	MAT_3_fpkm	ZSP_1_fpkm	ZSP_2_fpkm	ZSP_3_fpkm	MAT_1	MAT_2	MAT_3	ZSP_1	ZSP_2	ZSP_3	log2FoldChange	pvalue	padj	Annotation
BCR33DRAFT_757555	138.511	135.898	137.2	4.94704	7.59445	3.68674	1316.9	1328.15	1367.32	49.211	77.4621	37.1854	4.61087	2.71438e-63	4.61139e-62	V-type ATPase
BCR33DRAFT_711451	2757.19	2313.98	2079.7	336.331	357.271	302.338	19818.7	17097.5	15669.7	2529.44	2755.07	2305.49	2.79258	4.4987e-62	7.51591e-61	tubulin beta-2C chain
BCR33DRAFT_721456	196.372	182.814	167.295	15.7996	12.1274	14.545	662.526	634.012	591.64	55.7724	43.8952	52.0595	3.64555	1.20712e-46	1.58257e-45	V-type ATPase
BCR33DRAFT_756938	2732.07	2363	2081.23	432.935	426.112	347.353	22993	20442.5	18360.1	3812.21	3847.28	3101.26	2.52206	2.94243e-46	3.82112e-45	Gtp-tubulin in complex with A Darpin
BCR33DRAFT_792570	84.0744	76.132	74.1575	1.90644	4.97534	3.97812	691.405	643.577	639.255	16.4037	43.8952	34.7063	4.33508	4.3562e-45	5.51481e-44	ARM repeat-containing protein
BCR33DRAFT_758768	456.852	402.736	425.473	36.5485	21.0403	15.1319	1411.01	1278.61	1377.45	118.106	69.7159	49.5805	4.12572	1.77363e-41	2.08298e-40	V-type ATPase
BCR33DRAFT_714628	109.92	98.012	93.3547	2.04691	5.97041	7.01705	1683.83	1543.36	1499.02	32.8073	98.1186	114.035	4.24875	6.59907e-29	5.89041e-28	V0/A0 complex, 116-kDa subunit of ATPase
BCR33DRAFT_851689	56.4593	59.0053	60.576	10.737	13.0894	9.64909	560.599	602.243	630.475	111.545	139.432	101.64	2.34476	1.55333e-28	1.37193e-27	SecY protein
BCR33DRAFT_712198	288.266	247.984	271.467	41.4581	21.7323	18.8393	893.9	790.466	882.395	134.51	72.2979	61.9756	3.27989	9.84276e-27	8.14103e-26	V-type ATPase
BCR33DRAFT_757835	28.9805	25.6779	44.5179	0.230967	1.24099	0.688506	393.438	358.34	633.514	3.28073	18.0745	9.9161	5.41448	7.43601e-23	5.46501e-22	V-type ATPase
BCR33DRAFT_681588	33.6789	32.3884	32.2648	2.81105	4.00714	1.19709	262.972	259.959	264.077	22.9651	33.5669	9.9161	3.57827	1.83421e-22	1.33055e-21	ATPase, V1 complex, subunit C
BCR33DRAFT_711354	47.8996	48.6168	45.8469	0	0.799333	1.55215	288.453	300.951	289.404	0	5.16414	9.9161	5.74643	2.02631e-20	1.37791e-19	ATPase, V1/A1 complex, subunit D
BCR33DRAFT_357150	52.2542	46.2191	38.0934	0	2.78619	3.86446	315.974	287.287	241.451	0	18.0745	24.7902	4.21025	1.57695e-19	1.03913e-18	tubulin nucleotide-binding domain-like protein
BCR33DRAFT_758052	73.4055	61.3899	60.8004	12.5269	4.61538	8.21533	459.351	394.891	398.817	82.0183	30.9848	54.5385	2.93	3.14729e-19	2.0524e-18	ATPase, V0 complex, subunit D
BCR33DRAFT_720231	13.6008	8.05351	5.36212	0.241619	0.618202	0.630226	1059.02	644.602	437.652	19.6844	51.6414	52.0595	4.09563	2.35352e-17	1.43501e-16	hypothetical protein
BCR33DRAFT_719251	60.2486	52.9226	55.9637	8.50203	3.91557	10.9825	333.301	300.951	324.524	49.211	23.2386	64.4546	2.80849	3.4952e-17	2.11321e-16	tubulin alpha-1C chain-like protein
BCR33DRAFT_655262	86.587	76.5052	87.5859	12.6397	10.7799	13.6061	193.322	175.583	204.98	29.5266	25.8207	32.2273	2.71155	4.6265e-17	2.77168e-16	vacuolar ATP synthase
BCR33DRAFT_755205	38.2085	39.2371	40.8888	6.76823	11.4293	10.5924	177.013	186.856	198.564	32.8073	56.8055	52.0595	1.96478	3.34296e-12	1.56797e-11	snare-like protein
BCR33DRAFT_757273	6.26681	3.31033	1.97391	0.359479	0.153293	0.238132	491.968	267.132	162.431	29.5266	12.9103	19.8322	3.90998	6.20187e-12	2.84701e-11	hypothetical protein
BCR33DRAFT_720617	2.29613	1.54532	1.01071	0	0.119381	0.0289768	185.167	128.101	85.4366	0	10.3283	2.47903	4.87946	5.69797e-10	2.27362e-09	hypothetical protein
BCR33DRAFT_457792	13.7611	13.4599	8.65167	0	0.794696	1.80034	125.03	125.709	82.3974	0	7.74621	17.3532	3.63328	1.16095e-09	4.5074e-09	hypothetical protein
BCR33DRAFT_851265	3.67992	2.51656	1.63246	0.211381	0.378585	0.498844	327.525	230.239	152.3	19.6844	36.149	47.1015	2.7627	1.44746e-09	5.58105e-09	hypothetical protein
BCR33DRAFT_714104	4.56522	2.57731	1.90688	0.082856	0.222594	0.463108	345.533	200.52	151.287	6.56147	18.0745	37.1854	3.45544	1.71214e-09	6.56474e-09	hypothetical protein
BCR33DRAFT_715081	9.70559	9.23997	6.42161	0	0	0	76.4453	74.8107	53.018	0	0	0	7.06793	8.99321e-09	3.24939e-08	tubulin nucleotide-binding domain-like protein
BCR33DRAFT_758496	27.0103	28.241	27.6989	4.6886	10.1968	7.57064	108.382	116.486	116.504	19.6844	43.8952	32.2273	1.80306	5.65652e-08	1.90014e-07	hypothetical protein
BCR33DRAFT_853838	1.99343	1.55984	0.972625	0.285784	0.10968	0.34609	174.975	140.74	89.489	26.2459	10.3283	32.2273	2.56255	2.19552e-07	6.97349e-07	hypothetical protein
BCR33DRAFT_712279	78.5669	71.1137	80.911	27.0479	7.1866	19.3819	236.81	220.333	255.635	85.299	23.2386	61.9756	2.0835	2.47143e-07	7.81368e-07	hypothetical protein
BCR33DRAFT_256	32.518	22.6368	28.7506	5.40735	9.33874	6.04468	75.426	53.973	69.9027	13.1229	23.2386	14.8741	1.94299	1.2945e-05	3.37548e-05	hypothetical protein
BCR33DRAFT_684504	0.805202	0.516972	0.407201	0.114326	0.0877538	0	66.2525	43.725	35.1202	9.8422	7.74621	0	3.11983	2.96535e-05	7.41608e-05	hypothetical protein
BCR33DRAFT_716941	9.63395	9.32998	7.03734	0.658602	2.69615	3.43573	137.601	136.982	105.361	9.8422	41.3131	52.0595	1.84163	4.80172e-05	0.000116649	phosphatidylinositol 3-kinase
BCR33DRAFT_719243	14.9571	10.9282	5.98057	0	1.91485	1.23942	56.3996	42.3586	23.6386	0	7.74621	4.95805	3.18276	0.000130915	0.000300213	P-loop containing nucleoside triphosphate hydrolase protein
BCR33DRAFT_721677	38.0977	38.6361	36.4139	1.68904	9.07528	13.0071	424.356	442.374	425.157	19.6844	108.447	153.7	2.18419	0.000132904	0.00030459	SecY protein
BCR33DRAFT_696408	3.04742	28.698	3.69599	0	0.502039	0	14.6095	141.423	18.5732	0	2.58207	0	5.87972	0.000154525	0.000350209	ATPase, V1/A1 complex, subunit E
BCR33DRAFT_712026	2.87569	1.51455	1.1044	0.624953	0.0639598	0.372593	216.425	117.169	87.1251	49.211	5.16414	29.7483	2.34638	0.000423465	0.000900914	hypothetical protein
BCR33DRAFT_717660	2.47794	2.463	1.96859	0.247231	1.32838	0.368494	62.855	64.2211	52.3426	6.56147	36.149	9.9161	1.7365	0.00156935	0.00305398	hypothetical protein
BCR33DRAFT_765398	16.2791	16.7535	17.1138	3.91928	5.5153	12.1701	78.144	82.6675	86.112	19.6844	28.4028	61.9756	1.13469	0.00582659	0.0103031	FYVE/PHD zinc finger protein
BCR33DRAFT_720760	3.78523	2.82726	2.34929	0	0.975066	0	18.6866	14.3473	12.157	0	5.16414	0	3.05278	0.00855674	0.0146539	P-loop containing nucleoside triphosphate hydrolase protein
BCR33DRAFT_761902	2.95366	1.69865	1.08658	0.819827	1.19563	0.61097	225.938	133.566	87.1251	65.6146	98.1186	49.5805	1.06532	0.0237141	0.0373232	hypothetical protein
